1 **Title: Post-vaccination Omicron infections induce broader immunity across antigenic space**  
2 **than prototype mRNA COVID-19 booster vaccination or primary infection**

3

4 **Authors:** Wei Wang<sup>1+</sup>, Sabrina Lusvarghi<sup>1+</sup>, Rahul Subramanian<sup>2+</sup>, Nusrat J. Epsi<sup>3,4</sup>, Richard  
5 Wang<sup>1</sup>, Emilie Goguet<sup>4,5</sup>, Anthony C Fries<sup>6</sup>, Fernando Echegaray<sup>7</sup>, Russell Vassell<sup>1</sup>, Si'Ana  
6 Coggins<sup>4,5</sup>, Stephanie A. Richard<sup>3,4</sup>, David A. Lindholm<sup>8,9</sup>, Katrin Mende<sup>3,4</sup>, Evan Ewers<sup>10</sup>,  
7 Derek Larson<sup>10</sup>, Rhonda E. Colombo<sup>3,4,9,11</sup>, Christopher Colombo<sup>9,11</sup>, Janet O. Joseph<sup>7</sup>, Julia  
8 Rozman<sup>3,4</sup>, Alfred Smith<sup>12</sup>, Tahaniyat Lalani<sup>3,4,12</sup>, Catherine Berjohn<sup>13</sup>, Ryan Maves<sup>3,9</sup>, Milissa  
9 Jones<sup>14</sup>, Rupal Mody<sup>15</sup>, Nikhil Huprikar<sup>16</sup>, Jeffrey Livezey<sup>17</sup>, David Saunders<sup>9</sup>, Monique Hollis-  
10 Perry<sup>18</sup>, Gregory Wang<sup>19</sup>, Anuradha Ganesan<sup>3,4,16</sup>, Mark P. Simons<sup>3</sup>, Christopher C. Broder<sup>5</sup>,  
11 David Tribble<sup>3</sup>, Eric D. Laing<sup>5</sup>, Brian Agan<sup>3,4</sup>, Timothy H. Burgess<sup>3</sup>, Edward Mitre<sup>5</sup>, Simon D.  
12 Pollett<sup>3,4\*</sup>, Leah C. Katzelnick<sup>7\*</sup>, Carol D. Weiss<sup>1\*</sup>

13

14 <sup>+</sup>These authors contributed equally to the work.

15 \*Correspondence to: Carol Weiss ([Carol.Weiss@fda.hhs.gov](mailto:Carol.Weiss@fda.hhs.gov)), Leah Katzelnick  
16 ([leah.katzelnick@nih.gov](mailto:leah.katzelnick@nih.gov)), Simon Pollett ([spollett@idcrp.org](mailto:spollett@idcrp.org)).

17

18 <sup>1</sup>Division of Viral Products, Office of Vaccine Research and Review, Center for Biologics  
19 Evaluation and Research, U.S. Food and Drug Administration, Silver Spring, Maryland, USA

20 <sup>2</sup>Office of Data Science and Emerging Technologies, Office of Science Management and  
21 Operations, National Institute of Allergy and Infectious Diseases, National Institutes of Health,  
22 Bethesda, MD, USA

23 <sup>3</sup>Infectious Diseases Clinical Research Program, Department of Preventive Medicine and  
24 Biostatistics, Uniformed Services University of the Health Sciences, Bethesda, MD, USA  
25 <sup>4</sup>Henry M. Jackson Foundation for the Advancement of Military Medicine, Inc., Bethesda, MD,  
26 USA  
27 <sup>5</sup>Department of Microbiology and Immunology, Uniformed Services University of the Health  
28 Sciences, Bethesda, MD, USA  
29 <sup>6</sup>U.S. Air Force School of Aerospace Medicine, Wright-Patterson Air Force Base, OH, USA  
30 <sup>7</sup>Viral Epidemiology and Immunity Unit, Laboratory of Infectious Diseases, National Institute of  
31 Allergy and Infectious Diseases, National Institutes of Health, Bethesda, MD, USA  
32 <sup>8</sup>Brooke Army Medical Center, Joint Base San Antonio-Fort Sam Houston, TX, USA  
33 <sup>9</sup>Department of Medicine, Uniformed Services University of the Health Sciences, Bethesda, MD,  
34 USA  
35 <sup>10</sup>Fort Belvoir Community Hospital, Fort Belvoir, VA, USA  
36 <sup>11</sup>Madigan Army Medical Center, Joint Base Lewis McChord, WA, USA  
37 <sup>12</sup>Naval Medical Center Portsmouth, Portsmouth, VA, USA  
38 <sup>13</sup>Naval Medical Center San Diego, San Diego, CA, USA  
39 <sup>14</sup>Tripler Army Medical Center, Honolulu, HI, USA  
40 <sup>15</sup>William Beaumont Army Medical Center, El Paso, TX, USA  
41 <sup>16</sup>Walter Reed National Military Medical Center, Bethesda, MD, USA  
42 <sup>17</sup>Department of Pediatrics, Uniformed Services University of the Health Sciences, Bethesda,  
43 MD, USA  
44 <sup>18</sup>Clinical Trials Center, Infectious Diseases Directorate, Naval Medical Research Center, Silver  
45 Spring, MD, USA

46 <sup>19</sup>General Dynamics Information Technology, Falls Church, VA, USA

47

48 **Summary (150 words max):** The rapid emergence of new SARS-CoV-2 variants challenges  
49 vaccination strategies. Here, we measured antigenic diversity among variants and interpreted  
50 neutralizing antibody responses following single and multiple exposures in longitudinal infection  
51 and vaccine cohorts. Antigenic cartography using primary infection antisera showed that BA.2,  
52 BA.4/BA.5, and BA.2.12.1 are distinct from BA.1 and closer to the Beta cluster. Three doses of  
53 an mRNA COVID-19 vaccine increased breadth to BA.1 more than to BA.4/BA.5 or BA.2.12.1.  
54 Omicron BA.1 post-vaccination infection elicited antibody landscapes characterized by broader  
55 immunity across antigenic space than three doses alone, although with less breadth than expected  
56 to BA.2.12.1 and BA.4/BA.5. Those with Omicron BA.1 infection after two or three  
57 vaccinations had similar neutralizing titer magnitude and antigenic breadth. Accounting for  
58 antigenic differences among variants of concern when interpreting neutralizing antibody titers  
59 aids understanding of complex patterns in humoral immunity and informs selection of future  
60 COVID-19 vaccine strains.

61

## 62 INTRODUCTION

63

64 There is an urgent need to develop vaccination strategies to provide the broadest immunity  
65 against emerging and yet-to-emerge SARS-CoV-2 variants. COVID-19 has resulted in over 6.3  
66 million deaths and 540 million infections worldwide (World Health Organization, 2020). SARS-  
67 CoV-2 continues to circulate globally, even as population immunity continues to increase due to  
68 infections, reinfections, primary series vaccination and/or vaccine boosting (Bergeri et al., 2022).  
69 While authorized and licensed COVID-19 vaccines provide substantial protection against severe  
70 COVID-19, new emerging SARS-CoV-2 variants continue to threaten their effectiveness, even  
71 after vaccine boosting. An increased reinfection risk associated with the Omicron variant  
72 compared to earlier SARS-CoV-2 variants has been observed (Pulliam et al., 2022). Approved or  
73 authorized COVID-19 vaccines encode the spike protein of first SARS-CoV-2 strain to emerge,  
74 Wuhan-Hu-1, defined as the ancestral strain. An antigenically divergent strain, Omicron (BA.1),  
75 was first identified in November 2021 and has led to millions of infections, including post-  
76 vaccine infections (PVI), and prompting further recommendations for boosting. Additional  
77 variants closely related to Omicron, including BA.2 and its descendants were detected soon  
78 afterwards. Strikingly, these have rapidly outcompeted BA.1 strains. For example, BA.2.12.1,  
79 and BA.4 and BA.5 are now collectively now the most common variants in the United States  
80 (Center for Disease Control, 2022; UK Health Security Agency, 2022; Wang et al., 2022).

81

82 Vaccine formulations based on the ancestral Wuhan-Hu-1 strain antigen continue to be used for  
83 both primary series and booster vaccination schedules (World Health Organization, 2022b). A  
84 critical public health question is whether vaccinations derived from more recent strains

85 substantially increase immune magnitude and breadth above boosting with the same ancestral  
86 strain, including in populations which may be unvaccinated, vaccinated, boosted, infected,  
87 reinfectd, or various combinations thereof. It is known that three doses of COVID-19 mRNA  
88 vaccines containing the ancestral strain broaden immunity against a range of variants (Lusvarghi  
89 et al., 2022). However, fourth doses with the ancestral strain only transiently boost neutralizing  
90 antibody titers back to the peak observed after three (Bar-On et al., 2022; Magen et al., 2022;  
91 Regev-Yochay et al., 2022). In contrast, sequential exposure to the ancestral vaccine followed by  
92 Omicron PVI may induce broader neutralizing antibody responses than vaccination with three  
93 doses alone (Quandt et al., 2022) although other studies suggest protection against severe disease  
94 is similar (Gagne et al., 2022).

95  
96 Optimal timing and composition of SARS-CoV-2 vaccines for both boosters and primary series  
97 therefore remain unclear. The World Health Organization (WHO) recently noted that an  
98 Omicron vaccine may provide broader protection against emerging variants in individuals who  
99 have already received two doses of ancestral vaccines. WHO recommended that individuals who  
100 have not received a primary vaccine dose should still receive at least two doses of the ancestral-  
101 based vaccine rather than a single Omicron-based vaccine alone (World Health Organization,  
102 2022a). Recently released preliminary results involving bivalent vaccines containing both the  
103 ancestral strain and Omicron BA.1 suggest that they induce similar or broader immunity against  
104 BA.1 than a third dose with the ancestral strain alone (Chalkias et al., 2022; Pfizer, 2022).

105  
106 Antigenic diversity between Omicron variants has further complicated vaccine composition  
107 decision making. For example, a BA.1 booster may not provide sufficiently broad protection if

108 more recently emerged variants like BA.2.12.1 and BA.4/BA.5 escape immunity more than  
109 BA.1. BA.2.12.1 and BA.4/BA.5 contain additional spike mutations that make them more  
110 resistant than BA.1 or BA.2 to neutralization by sera from individuals with three vaccine doses  
111 (Hachmann *et al.*, 2022; Qu *et al.*, 2022; Wang *et al.*, 2022). Furthermore, individuals who have  
112 been vaccinated with BNT162b2 or vaccinated and infected with BA.1 or BA.2 have lower  
113 neutralizing antibody titers against BA.2.12 and BA.4/BA.5 compared to BA.1 or BA.2  
114 (Hachmann *et al.*, 2022; Quandt *et al.*, 2022). A similar observation was made with BBIBP-  
115 CorV (Sinopharm) vaccinated individuals with and without Omicron PVI (Yao *et al.*, 2022).  
116  
117 A challenge for informing vaccine strain selection with variant-specific antibody titers is the  
118 need to accommodate and interpret antibody breadth upon increasingly complex time-varying  
119 antigenic histories derived from infection, vaccination, or both (hybrid immunity). Compounding  
120 this challenge is the need to predict humoral immunity against yet-to-emerge variants. Antigenic  
121 cartography is a statistical method that geometrically interprets antibody titers, positioning  
122 variants in antigenic space based on how they are neutralized by primary exposure sera (Smith *et*  
123 *al.*, 2004). Techniques that build on antigenic cartography, like antibody landscapes, evaluate  
124 how immunological breadth changes following re-exposure versus primary exposure and predict  
125 titers against parts of antigenic space that are not yet occupied by variants (Fonville *et al.*, 2014).  
126 Very few antigenic maps have been made of SARS-CoV-2, likely because antigenic cartography  
127 requires well-characterized sera from individuals with primary exposure to distinct, sequence  
128 confirmed variants or experimentally inoculated animals (Amanat *et al.*, 2021; Lusvarghi *et al.*,  
129 2022; Mykytyn *et al.*, 2022; Neerukonda *et al.*, 2021b; Rössler *et al.*, 2022; van der Straten *et al.*,  
130 2022; Wilks *et al.*, 2022). While the antigenic maps of SARS-CoV-2 published to date agree on

131 the antigenic relationships between the ancestral strain, Delta, Beta, and Omicron, the positions  
132 of BA.2, BA.2.12, and BA.4/BA.5 remain uncertain.

133

134 In this study, we used antigenic cartography to measure the antigenic divergence among the  
135 major SARS-CoV-2 variants including BA.2, BA.2.12.1, and BA.4/BA.5 based on well-  
136 characterized sera from a longitudinal cohort following primary COVID-19 cases with sequence-  
137 confirmed variant infection histories. We complemented this with similar measurement from a  
138 separate cohort of uninfected individuals before and after their 2<sup>nd</sup> and then 3<sup>rd</sup> doses with  
139 mRNA vaccines. We then used antibody landscapes and other related tools to infer antigenic  
140 space and evaluate shifts in immunodominance following vaccination and infection. This  
141 approach enabled us to quantify the gain in magnitude and breadth following two or three doses  
142 with ancestral strain-based vaccines and Omicron PVI compared to boosting with the ancestral  
143 strain-based vaccine alone. Together, this analytical framework provides detailed information on  
144 breadth of observed and predicted immunity to SARS-CoV-2 variants following primary and  
145 subsequent exposure and informs selection of optimal vaccination strategies. This approach  
146 along with many other considerations, including variant surveillance, operational logistics, and  
147 availability of candidate vaccines and clinical data, can be used by public health authorities when  
148 making final recommendations for vaccine composition.

149

150



151 **RESULTS**

152

153 **Neutralization of VOCs by primary infection antisera.**

154

155 To measure the antigenic relationships among variants using well-characterized primary  
156 infection antisera, we used sera from SARS-CoV-2 infected participants from the Epidemiology,  
157 Immunology, and Clinical Characteristics of Emerging Infectious Diseases with Pandemic  
158 Potential (EPICC) study (**Table S1**) (Epsi et al., 2022). We identified n=47 serum samples  
159 collected 8 to 51 days post symptom onset (mean=28 days) from individuals with natural  
160 primary infections with 21 distinct variants (all prior to vaccination). All these unvaccinated  
161 individuals had sequenced, genotyped infecting viruses, matched with clinical and demographic  
162 data (**Table S1 and S3**). An additional 31 convalescent serum samples with known infecting  
163 genotype were purchased from Boca Biolistics (Pompano Beach, FL, USA, **Table S4, Table S5**)  
164 (Neerukonda *et al.*, 2021b). We also included an additional Beta-infected case from an unrelated  
165 FDA CBER study (see **Methods, Table S1**). Each of the 78 serum samples were titrated against  
166 a panel of SARS-CoV-2 lentiviral pseudoviruses representing the major variants, including  
167 variants of concern (n=15), including BA.1, BA.1.1, BA.2, BA.2.12.1, and BA.4/BA.5. A subset  
168 of sera was titrated against pseudoviruses consisting of ancestral strain with the D614G mutation  
169 (D614G) with one of seven individual point mutations introduced into the spike protein (**Table**  
170 **S6**).

171

172 Neutralization titers (ID<sub>50</sub>) for sera against each variant were grouped by infecting variant and  
173 shown in **Fig. 1**. For each serum group, significant differences in magnitude were observed

174 across the variant panel, although the pattern of neutralization depends on the infecting variant.  
175 Variant that temporally preceded Omicron also generally have lower titers against Omicron  
176 variants. The highest geometric mean titer (GMT) across sera was generally to the infecting  
177 variant, and Alpha and Delta sera showed higher titers against the infecting variant compared to  
178 D614G. Among the pre-Omicron infections, and in agreement with previous data (Aleem et al.,  
179 2022; Collier et al., 2021; Guo et al., 2022; Ho et al., 2021; Mlcochova et al., 2021; Uriu et al.,  
180 2021; Wang et al., 2021a; Wang et al., 2021b; Wibmer et al., 2021), the titers of Alpha, Delta,  
181 Epsilon, and Lambda convalescent serum against Beta, Gamma and Mu variants were in general  
182 lower than against other pre-Omicron variants. Titers graphed according to emergence of the  
183 variants are shown in Fig. 1 panel K, and fold changes relative to the infecting variant are shown  
184 in Fig.1 panel L.

185

186

187 **Primary infection antigenic maps show Omicron variants BA.2, BA.4/BA.5, and BA.212.1**  
188 **as antigenically distinct from BA.1 and shifted toward the Beta variant.**

189

190 We used antigenic cartography to interpret all 1240 primary natural infection neutralizing  
191 antibody titer measurements and quantify the breadth of immunity across variants. Using a form  
192 of multi-dimensional scaling, each strain and serum is positioned in high dimensional Euclidean  
193 space such that the distance between points corresponds to the measured neutralizing antibody  
194 titer. The closer a serum (square) is to a variant (circle), the higher the titer for that serum to that  
195 antigen. Overall, we find that the sera cluster near their respective infecting variants, as  
196 expected. Using cross-validation, excluding 10% of titers for each test, we determined that two

197 dimensions was sufficient to accurately fit the titers (average root mean squared error of 1.36  
198 antigenic units, variance of 0.04); 3D maps are shown in **Fig. S1**. Points on the antigenic map  
199 were well coordinated and robust to measurement error in the assay as well as bootstrapping of  
200 individual viruses and sera (**Fig. S2**).

201

202 Consistent with previously published SARS-CoV-2 antigenic maps (Amanat *et al.*, 2021;  
203 Lusvarghi *et al.*, 2022; Mykytyn *et al.*, 2022; Neerukonda *et al.*, 2021b; Rössler *et al.*, 2022; van  
204 der Straten *et al.*, 2022; Wilks *et al.*, 2022), we found four major variant groups that define the  
205 observed limits of SARS-CoV-2 antigenic space (**Fig. 2A**). These clusters generally correspond  
206 to groups with shared amino acid changes in the spike receptor binding domain, listed in  
207 parentheses below for each variant below. The variants clustered nearest to the ancestral strain  
208 (D614G) were Alpha (N501Y), Epsilon (L452R), and individual point mutations introduced into  
209 D614G (N501Y, L452R, T478K, R346K, and K417N). Lambda (L452Q and F490S) is only  
210 slightly further to the right and Delta slightly below the ancestral strain (L452R and T478K). To  
211 the top and right of the ancestral is the Beta cluster, consisting of Mu (E484K and N501Y),  
212 Gamma and Beta (E484K, N501Y, K417N/T), and D614G with both mutations E484K and  
213 N501Y. Iota (E484K), R.1 (E484K), and D614G with E484K are between the ancestral and Beta  
214 cluster, likely because they lack the additional antigenic mutation at N501Y. Omicron BA.1 and  
215 BA.1.1 are to the right and are most distant from the ancestral variant (123.3-fold difference).  
216 Both contain additional mutations in the receptor binding domain that are not observed in other  
217 VOCs, while BA.1.1 also contains R346K (**Fig 2E**). Strikingly, we found that BA.2.12.2, BA.2,  
218 and BA.4/BA.5 retain a large antigenic distance from the ancestral strain but are shifted away  
219 from BA.1 and BA.1.1 and toward the Beta cluster, supporting a recent observation that

220 BA.2.12.1, BA.4 and BA.5 escape antibodies elicited by Omicron infection (Cao et al., 2022).  
221 BA.2 has numerous changes relative to BA.1 and BA.1.1 but is closely related to BA.2.12.1 and  
222 BA.4/BA.5 (**Fig. 2E**).

223

224 **Antigenic maps of two and three dose COVID-19 mRNA vaccine sera show distinct**  
225 **antigenic relationships for Omicron variants.**

226

227 We next measured the neutralization breadth of sera collected from n=39 health care workers  
228 after two and three doses with COVID-19 mRNA vaccines as part of the Prospective Assessment  
229 of SARS-CoV-2 Seroconversion (PASS) study (see **Methods, Table S2**). Sera were titrated  
230 against D614G, four Omicron variants, BA.1, BA.2, BA.2.12.1, and BA.4/BA.5, and Beta, Mu,  
231 and Delta. The last three were chosen because they represented the most distant clusters on the  
232 convalescent map in Fig. 2A. After two doses, titers were highest to the ancestral strain and  
233 lowest to BA.1. (**Fig. 3A**). Titers were low but slightly higher against BA.2, BA.2.12.1 and  
234 BA.4/BA.5. Both BA.1 and BA.4/BA.5 had the fewest titers above assay cut-off (<40). In  
235 contrast, the third vaccine dose significantly boosted GMTs to all variants ( $P<0.0001$ ), with  
236 BA.2 having the highest titers among the Omicron-like viruses (831), followed by BA.1 (700),  
237 BA.2.12.1 (395), and BA.4 (355) (**Fig. 3B**).

238

239 Because antigenic maps can be made from sera with multiple exposures to the same antigen, we  
240 also used antigenic cartography to interpret neutralizing antibody titers for sera collected after  
241 two and three vaccine doses. Titers were accurately fit as antigenic maps in either one or two  
242 dimensions (**Fig. S1**) but coordination was less accurate than for the natural infection map (**Fig.**

243 **S2).** We found that the antigenic relationships of variants on the two doses vaccine antigenic  
244 map were similar to the natural infection map (**Fig. 2A and B**), with Beta, Mu, and Delta closer  
245 to the ancestral strain and BA.1 furthest from the ancestral strain, followed by the other Omicron  
246 variants. In contrast, a marked change in immunodominance was observed when the same  
247 vaccinated individuals received their third dose (**Fig. 2C**). The antigenic distance between the  
248 ancestral strain and BA.1 and BA.2 reduced to 7.1- and 6-fold difference, while BA.2.12.1 and  
249 BA.4/BA.5 remained more divergent, at 12.7 and 14.4-fold difference (**Fig. 2D**). This  
250 observation suggests that the third dose specifically increased more breadth to BA.1 and BA.2  
251 but less to BA.2.12.1 and BA.4/BA.5. A similar phenomenon was observed for Delta, which  
252 remained a similar antigenic distance following the third dose, compared to Beta and Mu, which  
253 shifted closer to the ancestral strain (Fig. 2C and 2D). These results suggest that booster  
254 vaccination with the ancestral variant selectively boosts antibodies to epitopes present on some  
255 variants but not others, in a way that is distinct from the antigenic distances measured based on  
256 primary infection serological responses.

257

258 **Two or three doses with COVID-19 mRNA vaccines followed by an Omicron PVI provided**  
259 **broader antibody breadth than three vaccine doses alone.**

260

261 Although there are important differences between vaccination and infection, comparing the  
262 breadth of immunity between individuals with Omicron PVIs to those with only three vaccine  
263 doses may be considered a proxy for comparing the breadth induced by different boosting  
264 strategies. We measured neutralizing antibody titers for individuals with PVIs in the EPICC  
265 study and compared their responses to those with only two or three vaccine doses from the PASS

266 study (**Table S1, Table S3**). In agree with previous report (Richardson et al., 2022), individuals  
267 with two vaccine doses followed by an Omicron (BA.1 or BA.1.1) PVI had high titers against  
268 previously circulating variants but lower against the early Omicron variants BA.1 and BA.2, and  
269 much lower for later variants BA.2.12.1 and BA.4/BA.5 (**Fig. 3F and G**). Among this group,  
270 some individuals with PVIs 8-10 months post-vaccination had a broader and higher magnitude  
271 response compared to individuals with PVIs 2-3 months post-vaccination. Individuals with three  
272 vaccine doses followed by Omicron (BA.1 or BA.1.1) PVI also had higher titers against BA.1,  
273 followed by BA.2, BA.2.12.1, and BA.4/BA.5, and overall higher titers than were observed after  
274 three vaccine doses alone. Individuals with two or three doses and then Delta infection had the  
275 highest titers against all VOCs (**Fig. 3D**). However, individuals with pre-Delta wave infection  
276 soon after two doses of vaccines had lower titers against all variants compared to other PVI  
277 groups, but higher titers than those in the two-dose vaccine group (**Fig. 3C**). Even if the  
278 neutralization titers dropped to background after the second vaccine, the PVI boosted high  
279 neutralization titers against all variants, indicating strong back-boosting to earlier variants (**Fig.**  
280 **3D**).

281

282 We used antibody landscapes to evaluate breadth across antigenic space, assuming antigenic  
283 distance measured by primary infection antisera is related to antigenic relationships seen by  
284 repeat exposure antisera. The x and y dimension correspond to the original two-dimensional  
285 antigenic map made with primary natural infection antisera. In the third dimension, at each virus  
286 position on the map, the height of the landscape corresponds to measured neutralization titer for  
287 that serum against the virus. Here, we use the method used by Rössler (Rössler *et al.*, 2022) and  
288 assume that antibody landscapes for individuals with multiple prior exposures cones with slopes

289 that can deviate from 1. We first tested whether infection with an antigenically distinct variant,  
290 such as BA.1 in those with prior vaccination induced broader immunity than a third dose with  
291 the ancestral strain. We found that individuals with two vaccine doses followed by Omicron  
292 (BA.1/BA.1.1) PVI had a more gradual slope, indicating broader immunity, than landscapes for  
293 individuals who received three doses of ancestral vaccine (**Fig. 4A and B**). Further, we found  
294 that Omicron (BA.1/BA.1.1) PVIs in those with 3 prior vaccine doses also broadened immunity  
295 beyond what was induced by the third vaccine dose, with a less steep slope and higher magnitude  
296 titers, consistent with a stronger, broader response (**Fig. 4B and C**). Notably, individuals with  
297 two or three doses and Omicron PVIs had broader immunity against Delta and Omicron variants  
298 BA.1, BA1.1, BA.2, BA.212.1, and BA.4/BA.5. Further, we found no substantial difference in  
299 breadth or magnitude between those with two versus three doses prior to Omicron PVI either  
300 from the raw titer data (**Fig. 3 F, G, and H**) or antibody landscapes (**Fig. 4 B and C**). Thus, an  
301 additional boost with the ancestral-based vaccine did not provide benefit in antibody responses..

302

303 **Detailed characterization of antibody breadth reveals boosting of immunity is lower to**  
304 **some variants, including BA.2.12.1 and BA.4/BA.5.**

305

306 When we examined the residuals of our antibody landscapes, we observed lower titers against  
307 BA.2.12.1 and BA.4/BA.5 than predicted by the landscape. We developed a new method, which  
308 we call the ‘breadth gain’ plot, to compare linear (cone-shaped landscape) and non-linear  
309 increases in antigenic breadth relative to the primary antigenic map (**Fig. 4D, Tables S7 to S10**).  
310 We use this method to quantify the extent to which Omicron PVIs provided broader immunity  
311 than three doses with the ancestral vaccines. The breadth gain plots for the cone-landscapes are

312 shown in **Fig. 4D**. The non-linear breadth gain plots (**Fig. 4E**) Omicron PVIs following two or  
313 three doses of vaccination provided significantly broader protection than three vaccine doses  
314 against Omicron variants BA.1, BA.1.1, and BA.2, as well as Delta. Compared to three vaccine  
315 doses alone, three vaccine doses and Omicron PVI induced significantly greater breadth to  
316 BA.4/BA.5, while this difference was not significant for those with two doses with Omicron  
317 PVI. Interestingly, however, boosting was more limited to BA.2.12.1 and BA.4/BA.5 as  
318 compared to BA.1, both following three vaccine doses or vaccination with Omicron PVI.  
319 Together, these observations suggested there may be ‘valleys’ in the antibody landscape,  
320 indicating regions of antigenic space with lower-than-expected titers. This could occur if certain  
321 epitopes present in distinct variants are preferentially boosted.

322

323

## 324 **DISCUSSION**

325

326 When considering a vaccine antigen to optimize protection, breadth should be framed in the  
327 context of circulating variants, as well as an antibody titer that would be needed for protection.  
328 Characterizing antibody breadth is complex, especially as SARS-CoV-2 continues to evolve and  
329 host exposure histories become more varied with each new wave of variants and vaccination  
330 campaigns. In this study, we provide an analytic framework to account for these antigenic  
331 determinants of humoral immunity. We used sera from individuals following primary infection,  
332 vaccination, and PVIs to examine how the antigenic characteristics of SARS-CoV-2 have  
333 diversified over time. We also introduced methods for quantifying immune breadth and  
334 magnitude that capture antigenic complexities when evaluating both primary and booster



335 vaccination strategies. This approach can be incorporated into a larger toolkit for identifying  
336 vaccine strategies that broadly boost across variants.

337

338 We cannot know how SARS-CoV-2 will evolve as it adapts to the human population with  
339 rapidly changing background immunity, so judgements will have to be made using best available  
340 data. Antigenic cartography provides a useful framework for evaluating the breadth of  
341 neutralizing responses across variants and has been used to monitor the antigenic evolution of  
342 influenza (Russell et al., 2008) and dengue viruses (Katzelnick et al., 2021), among other  
343 pathogens. Our antigenic maps of pre-Omicron variants agree with previously published  
344 antigenic maps of SARS-CoV-2 (Amanat *et al.*, 2021; Lusvarghi *et al.*, 2022; Mykytyn *et al.*,  
345 2022; Neerukonda *et al.*, 2021b; Rössler *et al.*, 2022; van der Straten *et al.*, 2022; Wilks *et al.*,  
346 2022), likely due in part to use of similar pseudovirus assays across laboratories. We find strong  
347 clustering of the original variants with shared amino acid positions, indicating that specific  
348 amino acid changes determine antigenic phenotype. The position of BA.2 on our map agrees  
349 with an experimental animal antigenic map (Mykytyn *et al.*, 2022) but differs from a map made  
350 with natural infection antisera (Rössler *et al.*, 2022) . We further showed that BA.2.12.1 and  
351 BA.4/BA.5 are closer to the Beta cluster, which may provide insight for related epitopes in these  
352 variants.

353

354 Our findings demonstrate differences in immunodominance hierarchies among variants, which  
355 could have implications for selection of new vaccine antigens. We found that a third vaccination  
356 with the ancestral variant selectively boosts antibodies to epitopes present on some variants but  
357 not others; specifically, breadth to BA.1 and BA.2, but not to BA.2.12.1 and BA.4/BA.5, was

358 increased. A similar phenomenon was observed for Delta, which remained a similar antigenic  
359 distance following the third dose, compared to Beta and Mu, which shifted closer to the ancestral  
360 strain. A previous study found that additional mutations in BA.2.12.1 (L452Q), and BA.4/BA.5  
361 (L452R, F486V and the deletion in 69-70) help explain antigenic differences relative to BA.2 for  
362 three dose vaccinee sera (Wang *et al.*, 2022). However, to our knowledge, the specific mutations  
363 that explain why antigenic distances measured based on sera from primary infection and two  
364 vaccine doses differ from those with three vaccine doses remains to be explained. If antigenic  
365 distance can be used to select an antigen for inducing breadth, then BA.4 might be expected to  
366 induce broader immunity than BA.1 in highly vaccinated populations. Alternatively, if it is  
367 beneficial to boost with variants in related regions of antigenic space, vaccination with  
368 Beta/Mu/Gamma-type variant might provide broader protection against BA.4/BA.5-type strains  
369 than either ancestral vaccination or BA.1/bivalent boosting because BA.4/BA.5 is shifted toward  
370 the Beta cluster (Launay *et al.*, 2022).

371  
372 We measured both the breadth and magnitude of antibody titers for individuals with multiple  
373 prior exposures using antibody landscapes. Antibody landscapes can be constructed using  
374 various methods depending on the amount of data, ranging from a simple plane (Wilks *et al.*,  
375 2022) to fitting a continuous surface with multiple datapoints (Fonville *et al.*, 2014). Given the  
376 more limited number of variants available for SARS-CoV-2, we fit antibody landscapes  
377 assuming they are shaped like a cone, with a variable peak location and slope (Rössler *et al.*,  
378 2022). This builds on an intrinsic feature of Euclidean antigenic space, which is that an antibody  
379 landscape for a primary infection serum that is perfectly fit by the antigenic map is a cone with a  
380 slope of 1, such that each two-fold drop in distance in the z-axis corresponding to a 2-fold drop

381 in the x and y-dimensions. Using this approach, we found that repeated exposure to the ancestral  
382 strain from an mRNA vaccine broadened immunity to previously circulating strains after the  
383 third dose, indicating strong back-boosting, as well as to the Omicron variants. However,  
384 individuals with two vaccine doses followed by Omicron PVIs had even flatter landscapes and  
385 hence broader immunity against ancestral and Omicron-lineage variants relative to individuals  
386 vaccinated with only the ancestral variant. We also found that three doses with Omicron PVI  
387 induced broader responses than three vaccine doses alone, suggesting that individuals who  
388 already received a third dose with the ancestral strain could still potentially broaden their  
389 immunity by receiving an Omicron vaccine. Finally, we evaluated whether individuals with a  
390 third vaccine dose followed by Omicron PVI obtained an extra gain in breadth due to their  
391 additional vaccine dose, but found their responses were similar to individuals with only two  
392 doses and Omicron PVI, at least in the short-term following vaccination. Notably, both those  
393 with two and three vaccine doses and Omicron PVI had greater breadth across a range of  
394 variants, including Delta. Delta is in the lower, more distant part of the antigenic map, suggesting  
395 back-boosting of responses to earlier variants by Omicron PVI. The effect may provide  
396 protection against possible future antigens that could occupy that region of space.

397  
398 To test for hills and valleys in antibody landscapes indicating preferential boosting of certain  
399 variants and weaker-than-expected boosting against other variants, we developed an analysis  
400 called the breadth gain plot. These analyses indeed showed lower responses to BA.2.12.1 and  
401 BA.4/BA.5 in all vaccinated and PVI groups than expected based on measured antigenic  
402 distances. This feature was not captured by our cone-based landscapes, which assume that  
403 because BA.21.2.1 and BA.4/BA.5 are closer to the ancestral strain than BA.1 on the antigenic

404 map, sera with high titers to both the ancestral strain and BA.1 would also have high titers to  
405 BA.2.12.1 and BA.4/BA.5. However, this finding matches our antigenic analyses showing that  
406 three vaccine doses preferentially boosted BA.1 and BA.2 but not BA.2.12.1 or BA.4/BA.5.  
407 Collectively, these results point to a complex immunodominance pattern in which responses are  
408 boosted (whether by repeated ancestral vaccination or Omicron PVI) against epitopes that  
409 present to a lesser degree on BA2.12.1 and BA.4/BA.5 compared to BA.1. The ‘valley’ in the  
410 landscape for BA.4/BA.5 is notable and may indicate the type of immunodominance patterns  
411 previously observed in viruses that have circulated in human populations for decades, such as  
412 influenza. For example, during the 2013-2014 flu season, the H1N1 virus infected large numbers  
413 of middle-aged adults (Linderman et al., 2014). Subsequent analyses showed that several  
414 mutations on the virus, occurred at epitopes that were targeted by antibody responses in middle-  
415 aged adults, likely due to their prior exposure history. Similarly, vaccine responses may also be  
416 shaped by immune imprinting from prior vaccines or different SARS-CoV-2 variant exposures  
417 (Reynolds et al., 2022). Thus, while infection and or vaccination with BA.1 could increase  
418 immunity to current Omicron variants, whether use of the BA.1 as a first Omicron antigenic  
419 exposure could affect subsequent immunodominance patterns to the other Omicron or future  
420 variants remains to be studied.

421  
422 Overall, our results show how the antigenic co-evolution of the SARS-CoV-2 and its immune  
423 response among the host human population become more elaborate with time. We present  
424 methods that can be used to characterize the breadth of immune responses to COVID-19 that  
425 account for diverse antigenic exposures. We show that Omicron PVIs generally induces broader  
426 immunity than boosting with the ancestral vaccine, and that additional exposure to both ancestral

427 and BA.1 antigens can even increase breadth against BA.4/BA.5. However, the breadth gained to  
428 BA.4/BA.5 is lower than against BA.1, even though BA.4 is antigenically closer to the ancestral  
429 strain, indicating complex immunodominance patterns. Understanding the mechanism behind  
430 these immunodominance shifts and carefully quantifying immune breadth may become  
431 increasingly important for developing vaccination strategies against future COVID-19 strains.  
432 Further, scientific insights into the evolution of antigenic diversity for SARS-COV-2 could also  
433 shed light on older antigenically complex diseases by illustrating how the immunodominance  
434 patterns and complex landscapes that we currently observe may have evolved.

435

#### 436 **LIMITATIONS OF THE STUDY**

437

438 Our study used convalescent serum samples that were collected at different times point post  
439 COVID-19 diagnosis (3-51 days), which could have affected measured magnitude and breadth.  
440 Some of the commercial serum samples reported sample collection dates soon after symptom  
441 onset. We only used samples that had high neutralization titers, suggesting that the infection may  
442 have been well underway before reported symptom onset. To maximize serum coverage of  
443 VOCs on the antigenic map, we included 10 samples that were not fully genotyped but assigned  
444 variant infections based on dates of circulating variants at the time of sample collection. Ideally  
445 antibody landscapes are constructed by fitting interpolated surfaces across antigenic space as in  
446 Fonville 2014, but there are not yet enough distinct VOCs for this method. The emergence of  
447 future variants, titration with additional subvariants, or generation of mutant pseudoviruses that  
448 probe unoccupied areas of antigenic space may make more comprehensive antibody landscape  
449 analyses possible. There were too few individuals with PVIs with other variants to evaluate

450 statistical significance with landscapes and breadth gain plots. Future studies on larger numbers  
451 of individuals or samples from clinical trials will provide further information on how sequential  
452 exposure to distinct antigens covers antigenic space. Finally, while neutralizing antibody titers  
453 measured with pseudovirus neutralization assays are correlated with protection, our study does  
454 not directly provide information on protection against VOCs. Further studies incorporating  
455 antibody landscapes with disease outcome data will provide further insights into how immune  
456 breadth across antigenic space is associated with clinical protection.

457 **STAR METHODS**

458

459 **Data and materials availability**

460 All data and code associated with this study are in the paper or supplementary materials. Sera  
461 samples are subject to an MTA and sera availability.

462

463 **Experimental Model and Subject Details**

464

465 Ethics statement.

466

467 The PASS (Protocol IDCRP-126) and EPICC (Protocol IDCRP-085) studies were approved by  
468 the Uniformed Services University of the Health Sciences Institutional Review Board (IRB) in  
469 compliance with all applicable Federal regulations governing the protection of human  
470 participants. All PASS and EPICC study participants provided informed consent. The  
471 convalescent Beta sera, obtained from a traveler who had moderate-severe COVID-19 in the  
472 Republic of South Africa during the peak of the Beta (B.1.351) wave in January 2021, was  
473 obtained with informed consent and covered under the US Food and Drug Administration IRB  
474 approved expedited protocol # 2021-CBER-045.

475

476 Collection of sera from vaccinees with no history of infection: study population, setting and  
477 procedures

478

479 Details of the Prospective Assessment of SARS-CoV-2 Seroconversion (PASS) study protocol,  
480 including details of the inclusion/exclusion criteria, have been previously published (Jackson-  
481 Thompson et al., 2021). Inclusion criteria included being generally healthy,  $\geq 18$  years old, and  
482 employed at the Walter Reed National Military Medical Center (WRNMMC), Bethesda as a  
483 healthcare worker. Exclusion criteria included history of COVID-19, IgG seropositivity for  
484 SARS-CoV-2 (as determined by a binding antibody assay) and being severely  
485 immunocompromised at time of screening. The study was initiated in August 2020, with rolling  
486 enrollment and monthly research clinic visits to obtain serum for longitudinal SARS-CoV-2  
487 antibody testing.

488  
489 The subset of PASS uninfected vaccinee participants selected for analysis of sero-responses were  
490 those who received two doses of Pfizer/BNT162b2 vaccine by January 26, 2021, had no  
491 serological or PCR evidence of SARS-CoV-2 infection prior to two doses of vaccine, and had  
492 received a 3rd dose of Pfizer/BNT162b2 vaccine by Nov 18, 2021. No subject included in this  
493 sub-analysis of vaccinated participants had a clinically apparent PCR-confirmed SARS-CoV-2  
494 infection during follow-up before sera collection. Participants' serum samples were collected  
495 monthly through September of 2021, and then quarterly.

496  
497 For the antibody binding assay used for screening at enrollment, serum samples were diluted  
498 1:400 and 1:8000 and screened for immunoglobulin G (IgG) reactivity with SARS-CoV-2 spike  
499 protein and nucleocapsid protein (N), and four human coronavirus (HCoV) spike proteins using a  
500 multiplex microsphere-based immunoassay, as previously described (Laing et al., 2021).

501



502 Collection of post-infection convalescent sera in vaccinated and unvaccinated study participants:  
503 setting and procedures

504

505 The Epidemiology, Immunology, and Clinical Characteristics of Emerging Infectious Diseases  
506 with Pandemic Potential (EPICC) study is a cohort study of U.S. Military Health System (MHS)  
507 beneficiaries that includes enrollment and longitudinal follow up of those with a history of  
508 SARS-CoV-2 infection (Richard et al., 2021). Eligibility criteria for enrollment included  
509 presenting to clinical care with COVID-19-like illness and being tested for SARS-CoV-2 by  
510 polymerase chain reaction (PCR) assay. The EPICC study enrolled between March 2020 and  
511 April 2022. For this analysis derived from SARS-CoV-2 infections, EPICC enrollment occurred  
512 at eight Military Treatment Facilities (MTFs): Brooke Army Medical Center, Fort Belvoir  
513 Community Hospital, Madigan Army Medical Center, Naval Medical Center Portsmouth, Naval  
514 Medical Center San Diego, Tripler Army Medical Center, Walter Reed National Military  
515 Medical Center, and the William Beaumont Army Medical Center.

516

517 Study procedures for these participants with SARS-CoV-2 infection included collection of  
518 demographic data, and completion of a clinical case report form (CRF) to characterize the acute  
519 SARS-CoV-2 infection. Biospecimen collection included serial serum samples for immune  
520 response analysis and upper respiratory specimen swabs for genotyping of SARS-CoV-2. For all  
521 enrolled participants, we also abstracted MHS-wide healthcare encounter data from the Military  
522 Health System Data Repository (MDR) to determine comorbidities. Vaccination status was  
523 ascertained by the MDR record, the CRF and questionnaire self-report.

524

525 In addition to convalescent sera from EPICC participants, we included convalescent sera from  
526 two PASS participants with SARS-CoV-2 infection in August 2021 (during the Delta epidemic).  
527 Both participants were vaccinated with two doses of mRNA COVID-19 vaccine at the time of  
528 SARS-CoV-2 infection (**Table S1**).

529

#### 530 Commercial convalescent sera

531 Convalescent sera from SARS-COV-2 infected donors were purchased from Boca Biolistics  
532 (Pompano Beach, FL). Samples were selected from the SARS-CoV-2 sequence inventory.  
533 Details about the serum donors are listed in **Table S4**. Genotypes of the infecting viruses are  
534 listed in **Table S5**.

535

#### 536 Diagnosis of SARS-CoV-2 infection and genotyping of infections used for convalescent sera

537 For EPICC participants, SARS-CoV-2 infection was determined by positive PCR clinical  
538 laboratory test performed at the enrolling clinical MTF site, or a follow-up upper respiratory  
539 swab collected as part of the EPICC study procedures. The specific PCR assay used at the MTF  
540 varied. The SARS-CoV-2 (2019-nCoV) CDC qPCR Probe Assay research-use-only kits  
541 (Integrated DNA Technologies, IDT, Coralville, IA) was used as the follow-up PCR assay (used  
542 for specimens collected as part of the EPICC study). This CDC qPCR assay uses two targets of  
543 the SARS-CoV-2 nucleocapsid (N) gene (N1 and N2), with an additional human RNase P gene  
544 (RP) control. We considered a positive SARS-CoV-2 infection as positive based on a cycle  
545 threshold value of less than 40 for both N1/N2 gene targets.

546

547 Whole viral genome sequencing was performed on extracted SARS-CoV-2 RNA from PCR  
548 positive specimens using a 1200bp amplicon tiling strategy  
549 (<https://doi.org/10.1093/biomethods/bpaa014>). Amplified product was prepared for sequencing  
550 using NexteraXT library kits (Illumina Inc., San Diego, CA) and libraries were run on the  
551 Illumina NextSeq 550 sequencing platform. Genome assembly used BMap v. 38.86 and iVar v.  
552 1.2.2 tools. The Pango classification tool (version 4.0.6) was used for lineage classification  
553 (<https://doi.org/10.21105/joss.03773>). In a small minority of SARS-CoV-2 infections (**Table**  
554 **S3**), a Pangolin lineage was unable to be ascertained and either a Nextclade clade  
555 (<https://doi.org/10.21105/joss.03773>) was used and/or a Pangolin lineage was inferred by manual  
556 inspection of key lineage-defining amino acid substitutions. Dates of infection were also used as  
557 supplementary information to ascertain infecting genotype in such instances where spike  
558 sequence quality was lower.

559

560 In addition, the infecting genotype for one EPICC participant (Cov-83) (**Table S3**) was  
561 determined using the Illumina Miseq platform; cDNA synthesis was performed using the  
562 Superscript IV first-strand synthesis system (Life Technologies/Invitrogen, Carlsbad, CA). The  
563 ARTIC v3 primer set was used for multiplex PCR to amplify overlapping regions of the SARS-  
564 CoV-2 reference genome (MN908947.3). Primer and genomic alignment position information is  
565 available here: [http://github.com/artic-network/artic-](http://github.com/artic-network/artic-ncov2019/tree/master/primer_schemes/nCoV-2019/V1)  
566 [ncov2019/tree/master/primer\\_schemes/nCoV-2019/V1](http://github.com/artic-network/artic-ncov2019/tree/master/primer_schemes/nCoV-2019/V1). The MinElute PCR purification kit  
567 (QIAGEN, Valencia, CA) was used to purify PCR products and libraries were prepared with the  
568 SMARTer PrepX DNA Library Kit (Takara Bio, Mountain View, CA), with use of the Apollo  
569 library prep system (Takara Bio, Mountain View, CA). The quality of these libraries was

570 evaluated using the Agilent 2200 TapeStation (Agilent, Santa Clara, CA); after quantification by  
571 real-time PCR using the KAPA SYBR FAST qPCR Kit (Roche, Pleasanton, CA), libraries were  
572 diluted to 10 nM.

573

574 Additionally, we included 10 convalescent sera with infecting genotype inferred by date of  
575 collection. Convalescent sera from seven vaccinated EPICC participants diagnosed with  
576 COVID-19 between 2/9/2021 and 4/2/2021 did not have corresponding viral sequence data to  
577 confirm the infecting genotype and were categorized as presumptive “pre-Delta” infections (**Fig**  
578 **3C, Table S2**). The infecting genotype of two PASS participants with vaccine breakthrough  
579 infections were inferred by date of infection (late August 2021, annotated as presumptive Delta  
580 infections, **Fig 3D and 3E, Table S1**). Additionally, we included in all analyses sera from a  
581 traveler who had COVID-19 in the Republic of South Africa during the peak of the Beta  
582 (B.1.351) wave in January 2021 (collected under a separate CBER protocol, 2021-CBER-045)  
583 (**Table S1**) and this was annotated as a presumptive Beta infection.

584

## 585 **Method Details**

586

### 587 Plasmids and Cell Lines.

588 Codon-optimized, full-length open reading frames of the spike genes of SARS-CoV-2 variants in  
589 the study (Table S6) were synthesized into pVRC8400 or pcDNA3.1(+) by GenScript  
590 (Piscataway, NJ, USA).. The HIV gag/pol packaging (pCMV $\Delta$ R8.2) and firefly luciferase  
591 encoding transfer vector (pHR'CMV-Luc) plasmids (Naldini et al., 1996; Zufferey et al., 1997)  
592 were obtained from the Vaccine Research Center (National Institutes of Health, Bethesda, MD,

593 USA). 293T-ACE2-TMPRSS2 cells stably expressing human angiotensin-converting enzyme 2  
594 (ACE2) and transmembrane serine protease 2 (TMPRSS2) (BEI Resources, Manassas, VA,  
595 USA; Cat no: NR-55293) (Neerukonda et al., 2021a) were maintained at 37°C in Dulbecco's  
596 modified eagle medium (DMEM) supplemented with high glucose, L-glutamine, minimal  
597 essential media (MEM) non-essential amino acids, penicillin/streptomycin, HEPES, and 10%  
598 fetal bovine serum (FBS).

599

#### 600 SARS-CoV-2 Pseudovirus Production and Neutralization Assay

601 HIV-based lentiviral pseudoviruses with desired SARS-CoV-2 spike proteins were generated as  
602 previously described (Neerukonda *et al.*, 2021a). Pseudoviruses comprising the spike  
603 glycoprotein and a firefly luciferase (FLuc) reporter gene packaged within HIV capsid were  
604 produced in 293T cells by co-transfection of 5 µg of pCMVΔR8.2, 5 µg of pHR'CMVLuc and  
605 0.5 µg of pVRC8400 or 4 µg of pcDNA3.1(+) encoding a codon-optimized spike gene.  
606 Pseudovirus supernatants were collected approximately 48 h post transfection, filtered through a  
607 0.45 µm low protein binding filter, and stored at -80°C.

608

609 Neutralization assays were performed using 293T-ACE2-TMPRSS2 cells in 96-well plates as  
610 previously described (Neerukonda *et al.*, 2021a). Pseudoviruses with titers of approximately 10<sup>6</sup>  
611 relative luminescence units per milliliter (RLU/mL) of luciferase activity were incubated with  
612 serially diluted sera for two hours at 37°C prior to inoculation onto the plates that were pre-  
613 seeded one day earlier with 3.0 × 10<sup>4</sup> cells/well. Pseudovirus infectivity was determined 48 h  
614 post inoculation for luciferase activity by luciferase assay reagent (Promega) according to the  
615 manufacturer's instructions. The inverse of the sera dilutions causing a 50% reduction of RLU

616 compared to control was reported as the neutralization titer (ID<sub>50</sub>). Titers were calculated using a  
617 nonlinear regression curve fit (GraphPad Prism Software Inc., La Jolla, CA, USA). The mean  
618 titer from at least two independent experiments each with intra-assay duplicates was reported as  
619 the final titer.

620

## 621 **Quantification and Statistical Analysis**

622

### 623 Statistical analysis of neutralizing antibody titer data.

624 One-way analysis of variance (ANOVA) with Dunnett's multiple comparisons tests (variants  
625 compared to D614G-, variants compared to BA.1), two-way ANOVA for the comparison of  
626 different groups (i.e., two-dose vaccine vs three-dose vaccine) and geometric mean titers (GMT)  
627 with 95% confidence intervals were performed using GraphPad Prism software. The P values of  
628 less than 0.05 were considered statistically significant. All neutralization titers were log<sub>2</sub>  
629 transformed for analyses.

630

### 631 Antigenic cartography

632 We used the Racmacs package (<https://acorg.github.io/Racmacs/>) for antigenic cartography  
633 analyses (Wilks *et al.*, 2022). Antigenic maps are quantitative visualizations that fit antibody  
634 titers as Euclidean distances between primary infection antisera and variants. Datasets with  
635 diverse variants and primary infection sera to each variant are best for making meaningful  
636 geometric interpretations, i.e., antigenic maps. Racmacs implements a modified multi-  
637 dimensional scaling approach as previously described (Smith *et al.*, 2004). Briefly, the virus best  
638 neutralized by each serum  $j$ , is defined as  $b_j$ .  $N_{ij}$  is the neutralization titer for serum  $j$  against virus

639 *i*. The antigenic distance,  $D_{ij}$ , for serum  $j$  to each virus  $i$  is defined relative to  $b_j$ :  $D_{ij} = \log_2(b_j) -$   
640  $\log_2(N_{ij})$ . The map Euclidean distance  $d_{ij}$  for each virus and serum is that which best fits the  
641 measured antigenic distance  $D_{ij}$  in each number of dimensions. The optimal set of map  
642 coordinates for each serum and virus is identified by minimizing the stress function  $E = \sum_{ij} e(D_{ij},$   
643  $d_{ij})$  thousands of times from random starting coordinates using a conjugate gradient optimization.  
644 For titers measured above the assay lower limit of quantitation, the stress function minimized is  
645  $(D_{ij} - d_{ij})^2$ . For titers below the assay lower limit of quantitation, the stress function minimized is  
646  $(D_{ij} - d_{ij} - I)^2 g(D_{ij} - d_{ij} - I)$ , where  $g(x) = \frac{1}{1 + 10^{-x}}$ . A unit of antigenic distance is equivalent to a  
647 two-fold dilution in neutralizing antibody titers. We performed various quality assessments for  
648 antigenic maps including evaluation of optimal dimensionality using cross validation,  
649 characterization of titer residuals, confidence coordination on the map, robustness to assay error  
650 and outlier viruses and sera.

651

### 652 Antibody landscapes.

653 We generated average landscapes for all serum samples with same overall infection history (e.g.  
654 2 doses of ancestral vaccine, 2 doses of ancestral + Omicron PVI etc), following the general  
655 approach of Roessler and Netzel et al. (Rössler *et al.*, 2022). We fitted three parameters for each  
656 landscape-the slope and x and y coordinates of the landscape peak. Let  $x_p$  and  $y_p$  represent the x  
657 and y coordinates of the landscape peak, and  $s_k$  the slope. We assume that each of these  
658 parameters has the same value across all serum samples within the serum group. Let  $c_j$  represent  
659 the column basis titer for each serum sample  $j$ . We assume that for each serum sample, the height  
660 of the landscape at the peak is equal to column base titer of the serum. Let  $A_{ip}$  represent the

661 antigenic distance between the peak and a particular measured antigen  $i$ . The predicted titer  
662 against measured antigen  $i$  for serum sample  $j$  is given by:

$$663 \quad Z_{ij} = c_j - s_k A_{ip}$$

664 Let  $T_{ij}$  denote the observed titer for serum sample  $j$  against measured antigen  $i$ . We use the  
665 function `optim()` in the R package `stats` to minimize the square error  $E$ , which is the sum of the  
666 difference between observed and predicted titers across all measured antigens and serum samples  
667 within the serum group:

668

$$669 \quad E = \sum_j \sum_i (T_{ij} - Z_{ij})^2$$

670

### 671 Breadth Gain Plots.

672 To obtain our measure for the relative breadth of the immune response for each individual (i.e.,  
673 serum sample), each individual's titer measurements against all measured VOCs were subtracted  
674 from the highest log titer for that serum across all antigens in the panel. This is the same type of  
675 titer normalization performed when constructing the antigenic map, and thus the units represent  
676 the same units of antigenic distance (i.e., 1 unit of distance corresponds to a 2-fold dilution). This  
677 is the “table distance” between the secondary infection serum and each measured antigen.

678

679 We then constructed our expectation of what this distance would be if the secondary immune  
680 response was identical to the primary infection response (i.e., if the secondary exposure did not  
681 change the response in any way). If the responses were identical, we would expect the peak of  
682 the landscape to be located on the antigenic map at the measured antigen closest to the primary



683 infecting strain and decay uniformly from that point, with titers against other antigens decreasing  
684 proportionally to their map distance from the infecting strain.

685

686 In general, we expect that titers will decrease as antigenic distance between a serum and  
687 measured antigens increases, just as we observe for primary infection sera. However, secondary  
688 infection sera, unlike primary infection sera, were not used to generate the primary infection  
689 antigenic map and thus we do not have readily available serum coordinates. Instead, for sera  
690 whose infecting strain was one of the antigens that were measured (and that thus have  
691 coordinates on the antigenic map), we use those coordinates in lieu of serum coordinates and  
692 then calculate the distance on the antigenic map between that strain and all other strains against  
693 which the serum was titrated. Visually, this is analogous to drawing a series of concentric circles  
694 on the antigenic map centered on the infecting strain and radiating out to all other measured  
695 antigens on the map, and then calculating the radius of each circle. We refer to these distances as  
696 the “map distances” hereafter.

697

698 Not all infecting strains have corresponding antigens in the panel used for titration. For strains  
699 that were not included in the panel but were structurally similar to other panel strains, we used  
700 the panel strain that most closely resembled the infecting strain as the reference strain. A table of  
701 infecting strains and corresponding reference strains is in (Atmar et al.).

702

703 We arranged the measured antigens on the x-axis in order of increasing map distance (i.e.,  
704 antigenic distance from the primary infecting strain). We then performed a Loess fit of the table  
705 distance between each measured antigen and the secondary infection serum, pooling all serum

706 with the same secondary infection history category. The mean and standard error for each Loess  
707 fit was calculated at each measured antigen and was used to obtain 95% confidence intervals  
708 (mean +/- 2 times the standard error). When performing the Loess fit, we also interpolated the  
709 table distance a vector of 80 evenly spaced points between 0.1 and 8 antigenic units from the  
710 primary infecting strain to create a uniform curve that could be compared across different  
711 infection histories.

712

713 To obtain the deviance in immune breadth for each point in the deviation breadth plot, we  
714 subtracted map distance from the calculated table distance. Positive deviation values denote  
715 broader immunity than expected against a particular measured antigen, while negative values  
716 denote narrower immunity than expected. Loess fits were conducted using the `loess()` function  
717 in the R package `stats` with the default span setting of 0.75, and antigenic map coordinates were  
718 extracted using the R package `racmacs`. All analyses for the breadth plots was performed using  
719 the statistical software R version 4.2.0 (R Core Team, 2022).

720

721 For each measured antigen, we compared the difference in the fold breadth gain between groups  
722 of serum samples with different exposure histories. One-sided Mann Whitney tests were  
723 conducted for each pair of exposure groups, with the null hypothesis being that both distributions  
724 were the same, and the alternate hypothesis being that the broader exposure history's distribution  
725 was greater than the distribution of the narrow exposure history. Classifications of "broad" and  
726 "narrow" exposure histories for purposes of one-sided comparison were made based on the  
727 breadth gain plot (**Figure 4E**). Tests were computed using the `wilcox.test` function in the R  
728 package `stats`.

729

730

731

732 **FIGURE LEGENDS**

733

734 **Figure 1. Neutralizing antibody titers (ID50 values) against SARS-CoV-2 variant**

735 **pseudoviruses for primary infection convalescent sera from individuals infected by**

736 **different Variants of Concern (VOCs). Sera from A) wildtype variant (D614G), B) Alpha, C)**

737 **Beta, D) Gamma, E) Delta, F) Epsilon, G) Lambda, H) Omicron (BA.1 or BA.1.1), I) Iota, and**

738 **J) other variants. Each grey line corresponds to one serum sample. Red arrow denotes the**

739 **infecting variant. Geometric mean neutralizing antibody titers (GMT) are listed for each variant.**

740 **Significance values for each variant are shown relative to the infecting variant. K) GMTs from**

741 **panels A-J for sera from the infecting variants (rows) against all measured antigens (columns).**

742 **Cells are shaded based on GMT, and serum-antigen pairs with larger titers have darker shades of**

743 **green. L) Fold reduction in titer for each serum-antigen pair relative to the titer to the infecting**

744 **variant (boxed in black). Each cell value represents the average fold change across all serum**

745 **samples with the same exposure history, and darker red cells denote larger relative reductions in**

746 **titer. For all neutralization assays, serum was diluted 1:40 followed by three-fold serial dilutions.**

747 **Neutralization assays were performed twice, each with an intra-assay duplicate. Neutralization**

748 **curves were fitted using nonlinear dose-response regression. Titers measuring below the lowest**

749 **serum dilution of 1:40 were treated as 20 for statistical analysis. Statistical analysis was**

750 **performed on the paired samples using the Friedman test, followed by post hoc Dunn's multiple**

751 comparison tests. P values for comparisons between the groups are shown, where  $*P \leq 0.05$ ,  
752  $**P \leq 0.01$ ,  $***P \leq 0.001$ , and  $****P \leq 0.0001$ .

753

754 **Figure 2. Antigenic maps made with neutralizing antibody titers from single-antigen**  
755 **exposure sera demonstrate BA.1, BA.2, BA.2.12.1, and BA.4/BA.5 are most antigenically**  
756 **distinct from other VOCs.** Antigenic maps were made using antigenic cartography with titers  
757 for **A)** sera collected after convalescent primary infection with distinct VOCs and sera from  
758 uninfected individuals who received **B) 2** doses or **C) 3** doses of WT mRNA COVID-19  
759 vaccines. Each grid-square side corresponds to a two-fold dilution in the pseudovirus  
760 neutralization assay. Antigenic distance is measured in any direction on the grid. Antigens are  
761 shown as circles and are labeled. Sera are shown as squares and are colored by infecting variant.  
762 **D)** Fold-difference in neutralization with 95% confidence intervals from the ancestral strain to  
763 each other variant on each map. For example, a fold-difference of four corresponds to two grid-  
764 squares on the antigenic map. **E)** Substitutions in the spike and receptor binding domains for all  
765 variants used in this study.

766

767 **Figure 3. Neutralizing antibody titers (ID50 values) against variant pseudoviruses from**  
768 **post-vaccination sera with and without post-vaccination infection (PVI).** Sera are from  
769 individuals who received **A) 2** doses of a WT mRNA COVID vaccine or **B) 3** doses of a WT  
770 mRNA COVID vaccine. Serum samples were obtained about 5-6 weeks following the last  
771 vaccine dose. Neutralizing antibody titers PVI after 2 doses of WT mRNA COVID vaccine in  
772 individuals infected with the **C)** pre-Delta wave (Alpha or Gamma or others), **D-E)** Delta, or **F-**  
773 **G)** Omicron (BA.1/BA.1.1). Each grey line corresponds to one serum sample. GMT are listed

774 for each variant. Significance values for each antigen are shown relative to the titer against  
775 D614G. Two of the Delta wave PVI serum samples in panel D) were measured at multiple time  
776 points, shown in panel E), from 1-month post-vaccine dose 2, and 1 month before and after PVI.  
777 Panel F shows titers from individuals with an Omicron (BA.1/BA.1.1) PVI 2-10 months after  
778 the second vaccine, while Panel G shows titers from individuals with an Omicron (BA.1/BA.1.1)  
779 PVI 1-5 months after the third vaccine. **H)** The GMT of individual variant after vaccination with  
780 or without PVI by timeline. For all neutralization assays, serum was diluted 1:40 followed by  
781 three-fold serial dilutions. Neutralization assays were performed twice, each with an intra-assay  
782 duplicate. Neutralization curves were fitted using nonlinear dose-response regression. Titers  
783 measuring below the lowest serum dilution of 1:40 were treated as 20 for statistical analysis.  
784 Statistical analysis was performed on the paired samples using the Friedman test, followed by  
785 post hoc Dunn's multiple comparison tests. P values for comparisons between the groups are  
786 shown, where \* $P \leq 0.05$ , \*\* $P \leq 0.01$ , \*\*\* $P \leq 0.001$ , and \*\*\*\* $P \leq 0.0001$ . NS: no significance; vx:  
787 vaccine. Pie charts indicate percent of serum sample above the lowest tested (1:40). Numbers in  
788 parentheses indicate fold reduction in titer relative to D614G.

789

790 **Figure 4. Antibody landscapes and breadth gain plots show that individuals with PVIs have**  
791 **a large gain in both breadth and magnitude compared to those with three mRNA vaccine**  
792 **doses alone.** Antibody landscapes are shown for individuals with **A)** 3 doses of mRNA vaccine  
793 **B)** 2 doses of mRNA vaccine followed by Omicron PVI, and **C)** 3 doses of mRNA vaccine  
794 followed by Omicron PVI. The x and y-axis on each landscape correspond to the 2D antigenic  
795 map constructed from convalescent sera in Fig. 2A, with colored points representing the  
796 locations of each measured antigen. The z-axis in each landscape represents the interpolated log

797 GMT for all individuals with that exposure history against each antigen. The average landscape  
798 for each serum group was constructed by fitting landscapes for each individual serum sample  
799 assuming that all landscapes with the same infection history have the same slope, with peak  
800 equal to the maximum observed titer value against any one of the measured antigens. The  
801 location of the peak titer value was fitted separately for each individual and then subsequently  
802 averaged. The colored lines represent the expected average log GMT for individuals with a  
803 particular infection history against each measured antigen. The color of the landscape, like the z-  
804 axis, corresponds to estimated log GMT across antigenic space. **D)** Breadth gain plots of the  
805 antibody landscapes in A-C for vaccinated individuals who received either a third mRNA  
806 vaccine dose, an Omicron PVI, or both. The x-axis represents the antigenic distance from the  
807 primary convalescent sera antigenic map (Fig. 2A) between the primary exposure variant and  
808 each measured antigen. Each unit on the y-axis represents the log-fold increase in titer against a  
809 particular measured antigen beyond a primary infection response and is used to compare the  
810 relative breadth of different exposure histories. Conceptually, the x-axis represents the antibody  
811 landscape for primary exposure sera projected into 1-dimension. The y-axis is in units of  
812 antigenic distance, corresponding to log fold-difference in neutralizing antibody titers (the same  
813 units as the antigenic map). **E)** Same as D, showing gain values for each set of sera with the  
814 same infection history interpolated from a loess fit (non-linear). Error bars represent the mean  
815 and 95% confidence intervals for at each measured antigen. Shading colors and lines denote the  
816 type of infecting variant and the number of vaccine doses received.

817

818

819 **SUPPLEMENTAL INFORMATION**

820

821 **Fig. S1. Evaluation of goodness of fit and dimensionality for antigenic maps made with**  
822 **primary infection antisera (column 1), two dose vaccine sera (column 2), and three dose**  
823 **vaccine sera (column 3).** Sera are shown as small colored squares, viruses as large circles. The  
824 grid corresponds to a two-fold dilution in the neutralization assay. Row 1 shows the antigenic  
825 map with error lines. The distance between the ends of error lines indicates the measured titer:  
826 red lines indicate that the map distance is less than measured based on the titers, blue lines when  
827 the map distance is greater than measured. Row 2 shows the difference between the table  
828 distance (estimated from the measured titer) and the fitted map distance. The dotted horizontal  
829 line shows what would be perfect a perfect fit of the data. Row 3 shows the results of  
830 dimensionality testing. Cross-validation (excluding 10% of titers as a test set in 100 independent  
831 repeats) was used to determine the optimal number of dimensions. Lower root mean squared  
832 error (RMSE) for both detectable titers (above the assay limit of detection) and undetectable  
833 (below the assay limit of detection) indicate the optimal number of dimensions for fitting the  
834 antigenic map. Row 4 shows antigenic maps made in three dimensions.

835

836

837 **Fig. S2. Evaluation of robustness in positioning for viruses and sera on antigenic maps**  
838 **made with primary infection antisera (column 1), two dose vaccine sera (column 2), and**  
839 **three dose vaccine sera (column 3).** Sera are shown as open shapes, viruses as colored shapes.  
840 The grid corresponds to a two-fold dilution in the neutralization assay. Row 1 shows  
841 triangulation/coordination confidence intervals, indicating confidence in positioning of points.

842 Each shape marks the area that the point can occupy before increasing the total map error by  
843 more than 1 antigenic unit. Row 2 shows bootstrapped maps considering titer error for the  
844 neutralization assay. The shapes correspond to the positions of points on resampled maps  
845 assuming titers have random noise added with the measured assay standard deviation of  $\log_2$   
846 0.29 (1.2-fold). Row 3 shows confidence in coordination of points following bootstrapping of  
847 the sera and viruses.

848

849 **Fig. S3.** Comparison of virus positions between antigenic maps. Arrows point to virus positions  
850 from one map to another. Sera are shown as small squares, viruses as colored circles. The grid  
851 corresponds to a two-fold dilution in the neutralization assay.

852

853 **Table S1.** Characteristics of post-infection convalescent participants.

854

855 **Table S2.** Characteristics of post-vaccination uninfected participants.

856

857 **Table S3.** SARS-CoV-2 sequence data from SARS-CoV-2 infections.

858

859 **Table S4.** Commercially obtained convalescent sera.

860

861 **Table S5.** Spike mutations of commercially obtained convalescent sera.

862

863 **Table S6.** SARS-CoV2 variant spikes used in neutralization assays.

864



865 **Table S7.** Median, standard deviation, and confidence intervals for fold breadth gain for each  
866 exposure history against each measured antigen from observed data.

867

868 **Table S8.** Significance values for breadth gain comparisons

869

870 **Table S9.** Slope and Peak Location for Individual Antibody Landscapes

871

872 **Table S10.** Summary statistics of cone slope for individual landscapes grouped by exposure  
873 history

874

875

## 876 **ACKNOWLEDGMENTS**

877

878 We sincerely thank the members of the EPICC COVID-19 Cohort Study Group for their many

879 contributions in conducting the study and ensuring effective protocol operations. The authors

880 wish to also acknowledge all who have contributed to the EPICC COVID-19 study: *Brooke*

881 *Army Medical Center, Fort Sam Houston, TX: Col J. Cowden; LTC M. Darling; S. DeLeon; Maj*

882 *D. Lindholm; LTC A. Markelz; K. Mende; S. Merritt; T. Merritt; LTC N. Turner; CPT T.*

883 *Wellington. Carl R. Darnall Army Medical Center, Fort Hood, TX: LTC S. Bazan; P.K Love.*

884 *Fort Belvoir Community Hospital, Fort Belvoir, VA: N. Dimascio-Johnson; MAJ E. Ewers;*

885 *LCDR K. Gallagher; LCDR D. Larson; A. Rutt. Henry M. Jackson Foundation, Inc., Bethesda,*

886 *MD: P. Blair; J. Chenoweth; D. Clark. Madigan Army Medical Center, Joint Base Lewis*

887 *McChord, WA: S. Chambers; LTC C. Colombo; R. Colombo; CAPT C. Conlon; CAPT K.*

888 *Everson; COL P. Faestel; COL T. Ferguson; MAJ L. Gordon; LTC S. Grogan; CAPT S. Lis;*

889 COL C. Mount; LTC D. Musfeldt; CPT D. Odineal; LTC M. Perreault; W. Robb-McGrath; MAJ  
890 R. Sainato; C. Schofield; COL C. Skinner; M. Stein; MAJ M. Switzer; MAJ M. Timlin; MAJ S.  
891 Wood. *Naval Medical Center Portsmouth, Portsmouth, VA*: S. Banks; R. Carpenter; L. Kim;  
892 CAPT K. Kronmann; T. Lalani; LCDR T. Lee; LCDR A. Smith; R. Smith; R. Tant; T.  
893 Warkentien. *Naval Medical Center San Diego, San Diego, CA*: CDR C. Berjohn; S. Cammarata;  
894 N. Kirkland; D. Libraty; CAPT (Ret) R. Maves; CAPT (Ret) G. Utz. *Tripler Army Medical*  
895 *Center, Honolulu, HI*: S. Chi; LTC R. Flanagan; MAJ M. Jones; C. Lucas; LTC (Ret) C. Madar;  
896 K. Miyasato; C. Uyehara. *Uniformed Services University of the Health Sciences, Bethesda, MD*:  
897 B. Agan; L. Andronescu; A. Austin; C. Broder; CAPT T. Burgess; C. Byrne; COL (Ret.) K  
898 Chung; J. Davies; C. English; N. Epsi; C. Fox; M. Fritschlanski; M. Grother; A. Hadley; COL P.  
899 Hickey; E. Laing; LTC C. Lanteri; LTC J. Livezey; A. Malloy; R. Mohammed; C. Morales; P.  
900 Nwachukwu; C. Olsen; E. Parmelee; S. Pollett; S. Richard; J. Rozman; J. Rusiecki; E. Samuels;  
901 P. Nwachukwu; M. Tso; M. Sanchez; A. Scher; CDR M. Simons; A. Snow; K. Telu; D. Tribble;  
902 L. Ulomi. *United States Air Force School of Aerospace Medicine, Dayton, OH*: TSgt T. Chao; R.  
903 Chapleau; M. Christian; A. Fries; C. Harrington; V. Hogan; S. Huntsberger; K. Lanter; E.  
904 Macias; J. Meyer; S. Purves; K. Reynolds; J. Rodriguez; C. Starr. *United States Army Medical*  
905 *Research Institute of Infectious Diseases*; J Kugelman, *United States Coast Guard, Washington,*  
906 *DC*: CAPT J. Iskander, CDR I. Kamara. *Womack Army Medical Center, Fort Bragg, NC*: B.  
907 Barton; LTC D. Hostler; LTC J. Hostler; MAJ K. Lago; C. Maldonado; J. Mehrer. *William*  
908 *Beaumont Army Medical Center, El Paso, TX*: MAJ T. Hunter; J. Mejia; J. Montes; R. Mody; R.  
909 Resendez; P. Sandoval; M. Wayman. *Walter Reed National Military Medical Center, Bethesda,*  
910 *MD*: I. Barahona; A. Baya; A. Ganesan; MAJ N. Huprikar; B. Johnson. *Walter Reed Army*  
911 *Institute of Research, Silver Spring, MD*: S. Peel. The authors wish to also acknowledge the

912 following individuals for their contributions to the PASS (IDCRP-126) COVID-19 study. *Henry*  
913 *M. Jackson Foundation, Inc., Bethesda, MD*: Alyssa Lindrose, Matthew Moser, Emily C.  
914 Samuels, Belinda Jackson-Thompson, Julian Davies, Luca Illinik, Mimi Sanchez, Orlando  
915 Ortega, Edward Parmelee. *NMRC-CTC (Naval Medical Research Center – Clinical Trials*  
916 *Center)*: Santina E. Maiolatesi. Christopher A. Duplessis. *NMRC-CTC/General Dynamics*.  
917 Kathleen F. Ramsey, Anatalio E. Reyes, Yolanda Alcorta, Mimi A. Wong.

918 We also wish to thank Drs. Douglas Pratt and Gabriel Parra (FDA) for critical review of the  
919 manuscript.

920

## 921 **AUTHOR CONTRIBUTIONS**

- 922 a. Conceived and designed the study / experiments: WW, SL, LCK, CDW, SP
- 923 b. Acquired data / performed experiments: WW, SL, CDW, ACF, RW, EL, EG, RV, SC, MPS,  
924 DRT, THB, BKA, EM, SDP
- 925 c. Created detailed analysis plan and/or analyzed the data: WW, LCK, CDW, SL, RS, NE, ACF,  
926 FE, JOJ, SR
- 927 d. Interpreted findings: WW, LCK, CDW, SL, RS, ACF, SP, EM, EL, CB
- 928 e. Contributed resources; reagents/materials/specimens: EG, JR, DAL, KM, EE, DTL, REC,  
929 CJC, AS, TL, CMB, RCM, MUJ, RM, NH, JL, DS, MHP, GW, AG, MPS, CDW
- 930 f. Composed first draft of manuscript: WW, LCK, CDW, SL, RS, SP
- 931 g. Provided critical revisions and edits (scientific content) to provisional drafts: WW, LCK,  
932 CDW, SL, RS, NE, ACF, EM, EL, EM
- 933 h. Reviewed and approved final version for submission: All Authors

934

935

936 **DECLARATION OF INTERESTS**

937

938 Potential conflicts of interest. S. D. P., T. H. B, and M.P.S. report that the Uniformed Services  
939 University (USU) Infectious Diseases Clinical Research Program (IDCRP), a US Department of  
940 Defense institution, and the Henry M. Jackson Foundation (HJF) were funded under a  
941 Cooperative Research and Development Agreement to conduct an unrelated phase III COVID-19  
942 monoclonal antibody immunoprophylaxis trial sponsored by AstraZeneca. The HJF, in support  
943 of the USU IDCRP, was funded by the Department of Defense Joint Program Executive Office  
944 for Chemical, Biological, Radiological, and Nuclear Defense to augment the conduct of an  
945 unrelated phase III vaccine trial sponsored by AstraZeneca. Both trials were part of the US  
946 Government COVID-19 response. Neither is related to the work presented here. The other co-  
947 authors have nothing to declare.

948

949 **FINANCIAL SUPPORT**

950 This work was supported by: institutional research funds from the US Food and Drug  
951 Administration (FDA); the US Department of Health and Human Services, Office of the  
952 Assistant Secretary for Preparedness and Response, Biomedical Advanced Research and  
953 Development Authority; the Intramural Research Program of the National Institute of Allergy  
954 and Infectious Diseases; and awards from the Defense Health Program (HU00012020067,  
955 HU00012020094, HU00012120104) and the National Institute of Allergy and Infectious Disease  
956 (HU00011920111). The protocol was executed by the Infectious Disease Clinical Research

957 Program (IDCRP), a Department of Defense (DoD) program executed by the Uniformed  
958 Services University of the Health Sciences (USUHS) through a cooperative agreement by the  
959 Henry M. Jackson Foundation for the Advancement of Military Medicine, Inc. (HJF). This  
960 project has been funded in part by the National Institute of Allergy and Infectious Diseases at the  
961 National Institutes of Health, under an interagency agreement (Y1-AI-5072). RS was supported  
962 in part by an appointment to the National Institute of Allergy and Infectious Diseases (NIAID)  
963 Emerging Leaders in Data Science Research Participation Program.

964

## 965 **DISCLAIMERS**

966

967 The contents of this publication are the sole responsibility of the author (s) and do not necessarily  
968 reflect the views, opinions, or policies of Uniformed Services University of the Health Sciences  
969 (USUHS); the Department of Defense (DoD); the Departments of the Army, Navy, or Air Force;  
970 the Defense Health Agency, or the Henry M. Jackson Foundation for the Advancement of  
971 Military Medicine Inc. Mention of trade names, commercial products, or organizations does not  
972 imply endorsement by the U.S. Government. The investigators have adhered to the policies for  
973 protection of human subjects as prescribed in 45 CFR 46. The Emerging Leaders in Data Science  
974 Research Participation Program is administered by the Oak Ridge Institute for Science and  
975 Education through an interagency agreement between the U.S. Department of Energy (DOE) and  
976 NIAID. ORISE is managed by ORAU under DOE contract number DE-SC0014664. All  
977 opinions expressed in this paper are the author's and do not necessarily reflect the policies and  
978 views of FDA, NIAID, DOE, or ORAU/ORISE.

979

980

981

## 982 REFERENCES

983

- 984 Aleem, A., Akbar Samad, A.B., and Slenker, A.K. (2022). Emerging Variants of SARS-CoV-2 And Novel  
985 Therapeutics Against Coronavirus (COVID-19). In StatPearls.
- 986 Amanat, F., Strohmeier, S., Meade, P.S., Dambrauskas, N., Muhlemann, B., Smith, D.J., Vigdorovich, V.,  
987 Sather, D.N., Coughlan, L., and Krammer, F. (2021). Vaccination with SARS-CoV-2 variants of concern  
988 protects mice from challenge with wild-type virus. *PLoS Biol* 19, e3001384.  
989 10.1371/journal.pbio.3001384.
- 990 Atmar, R.L., Lyke, K.E., Deming, M.E., Jackson, L.A., Branche, A.R., El Sahly, H.M., Rostad, C.A., Martin,  
991 J.M., Johnston, C., Rupp, R.E., et al. (2021). Heterologous SARS-CoV-2 Booster Vaccinations: Preliminary  
992 Report. medRxiv, 2021.2010.2010.21264827. 10.1101/2021.10.10.21264827.
- 993 Bar-On, Y.M., Goldberg, Y., Mandel, M., Bodenheimer, O., Amir, O., Freedman, L., Alroy-Preis, S., Ash, N.,  
994 Huppert, A., and Milo, R. (2022). Protection by a Fourth Dose of BNT162b2 against Omicron in Israel. *N*  
995 *Engl J Med* 386, 1712-1720. 10.1056/NEJMoa2201570.
- 996 Bergeri, I., Whelan, M., Ware, H., Subissi, L., Nardone, A., Lewis, H.C., Li, Z., Ma, X., Valenciano, M.,  
997 Cheng, B., et al. (2022). Global epidemiology of SARS-CoV-2 infection: a systematic review and meta-  
998 analysis of standardized population-based seroprevalence studies, Jan 2020-Dec 2021. medRxiv,  
999 2021.2012.2014.21267791. 10.1101/2021.12.14.21267791.
- 1000 Cao, Y., Yisimayi, A., Jian, F., Song, W., Xiao, T., Wang, L., Du, S., Wang, J., Li, Q., Chen, X., et al. (2022).  
1001 BA.2.12.1, BA.4 and BA.5 escape antibodies elicited by Omicron infection. *Nature*. 10.1038/s41586-022-  
1002 04980-y.
- 1003 Center for Disease Control (2022). COVID Data Tracker.
- 1004 Chalkias, S., Harper, C., Vrbicky, K., Walsh, S.R., Essink, B., Brosz, A., McGhee, N., Tomassini, J.E., Chen,  
1005 X., Chang, Y., et al. (2022). A Bivalent Omicron-containing Booster Vaccine Against Covid-19. medRxiv,  
1006 2022.2006.2024.22276703. 10.1101/2022.06.24.22276703.
- 1007 Collier, D.A., De Marco, A., Ferreira, I., Meng, B., Datir, R.P., Walls, A.C., Kemp, S.A., Bassi, J., Pinto, D.,  
1008 Silacci-Fregni, C., et al. (2021). Sensitivity of SARS-CoV-2 B.1.1.7 to mRNA vaccine-elicited antibodies.  
1009 *Nature* 593, 136-141. 10.1038/s41586-021-03412-7.
- 1010 Epsi, N.J., Richard, S.A., Lindholm, D.A., Mende, K., Ganesan, A., Huprikar, N., Lalani, T., Fries, A.C.,  
1011 Maves, R.C., Colombo, R.E., et al. (2022). Understanding 'hybrid immunity': comparison and predictors  
1012 of humoral immune responses to SARS-CoV-2 infection and COVID-19 vaccines. *Clinical Infectious*  
1013 *Diseases*. 10.1093/cid/ciac392.
- 1014 Fonville, J.M., Wilks, S.H., James, S.L., Fox, A., Ventresca, M., Aban, M., Xue, L., Jones, T.C., Le, N.M.H.,  
1015 Pham, Q.T., et al. (2014). Antibody landscapes after influenza virus infection or vaccination. *Science* 346,  
1016 996-1000. 10.1126/science.1256427.
- 1017 Gagne, M., Moliva, J.I., Foulds, K.E., Andrew, S.F., Flynn, B.J., Werner, A.P., Wagner, D.A., Teng, I.T., Lin,  
1018 B.C., Moore, C., et al. (2022). mRNA-1273 or mRNA-Omicron boost in vaccinated macaques elicits similar  
1019 B cell expansion, neutralizing responses, and protection from Omicron. *Cell* 185, 1556-1571 e1518.  
1020 10.1016/j.cell.2022.03.038.
- 1021 Guo, H., Fan, Q., Song, S., Shen, S., Zhou, B., Wang, H., Cheng, L., Ge, X., Ju, B., and Zhang, Z. (2022).  
1022 Increased resistance of SARS-CoV-2 Lambda variant to antibody neutralization. *J Clin Virol* 150-151,  
1023 105162. 10.1016/j.jcv.2022.105162.
- 1024 Hachmann, N.P., Miller, J., Collier, A.Y., Ventura, J.D., Yu, J., Rowe, M., Bondzie, E.A., Powers, O., Surve,  
1025 N., Hall, K., and Barouch, D.H. (2022). Neutralization Escape by SARS-CoV-2 Omicron Subvariants  
1026 BA.2.12.1, BA.4, and BA.5. *N Engl J Med*. 10.1056/NEJMc2206576.

1027 Ho, D., Wang, P., Liu, L., Iketani, S., Luo, Y., Guo, Y., Wang, M., Yu, J., Zhang, B., Kwong, P., et al. (2021).  
1028 Increased Resistance of SARS-CoV-2 Variants B.1.351 and B.1.1.7 to Antibody Neutralization. *Res Sq*.  
1029 10.21203/rs.3.rs-155394/v1.  
1030 Jackson-Thompson, B.M., Goguet, E., Laing, E.D., Olsen, C.H., Pollett, S., Hollis-Perry, K.M., Maiolatesi,  
1031 S.E., Illinik, L., Ramsey, K.F., Reyes, A.E., et al. (2021). Prospective Assessment of SARS-CoV-2  
1032 Seroconversion (PASS) study: an observational cohort study of SARS-CoV-2 infection and vaccination in  
1033 healthcare workers. *BMC Infect Dis* 21, 544. 10.1186/s12879-021-06233-1.  
1034 Katzelnick, L.C., Coello Escoto, A., Huang, A.T., Garcia-Carreras, B., Chowdhury, N., Maljkovic Berry, I.,  
1035 Chavez, C., Buchy, P., Duong, V., Dussart, P., et al. (2021). Antigenic evolution of dengue viruses over 20  
1036 years. *Science* 374, 999-1004. 10.1126/science.abk0058.  
1037 Laing, E.D., Sterling, S.L., Richard, S.A., Epsi, N.J., Coggins, S., Samuels, E.C., Phogat, S., Yan, L., Moreno,  
1038 N., Coles, C.L., et al. (2021). Antigen-based multiplex strategies to discriminate SARS-CoV-2 natural and  
1039 vaccine induced immunity from seasonal human coronavirus humoral responses. *medRxiv*.  
1040 10.1101/2021.02.10.21251518.  
1041 Launay, O., Cahanado, M., Luong Nguyen, L.B., Ninove, L., Lachatre, M., Ben Ghezala, I., Bardou, M.,  
1042 Schmidt-Mutter, C., Lacombe, K., Laine, F., et al. (2022). Immunogenicity and Safety of Beta-Adjuvanted  
1043 Recombinant Booster Vaccine. *N Engl J Med*. 10.1056/NEJMc2206711.  
1044 Linderman, S.L., Chambers, B.S., Zost, S.J., Parkhouse, K., Li, Y., Herrmann, C., Ellebedy, A.H., Carter,  
1045 D.M., Andrews, S.F., Zheng, N.Y., et al. (2014). Potential antigenic explanation for atypical H1N1  
1046 infections among middle-aged adults during the 2013-2014 influenza season. *Proc Natl Acad Sci U S A*  
1047 111, 15798-15803. 10.1073/pnas.1409171111.  
1048 Lusvardi, S., Pollett, S.D., Neerukonda, S.N., Wang, W., Wang, R., Vassell, R., Epsi, N.J., Fries, A.C., Agan,  
1049 B.K., Lindholm, D.A., et al. (2022). SARS-CoV-2 BA.1 variant is neutralized by vaccine booster-elicited  
1050 serum but evades most convalescent serum and therapeutic antibodies. *Sci Transl Med* 14, eabn8543.  
1051 10.1126/scitranslmed.abn8543.  
1052 Magen, O., Waxman, J.G., Makov-Assif, M., Vered, R., Dicker, D., Hernan, M.A., Lipsitch, M., Reis, B.Y.,  
1053 Balicer, R.D., and Dagan, N. (2022). Fourth Dose of BNT162b2 mRNA Covid-19 Vaccine in a Nationwide  
1054 Setting. *N Engl J Med* 386, 1603-1614. 10.1056/NEJMoa2201688.  
1055 Mlcochova, P., Kemp, S.A., Dhar, M.S., Papa, G., Meng, B., Ferreira, I., Datir, R., Collier, D.A., Albecka, A.,  
1056 Singh, S., et al. (2021). SARS-CoV-2 B.1.617.2 Delta variant replication and immune evasion. *Nature* 599,  
1057 114-119. 10.1038/s41586-021-03944-y.  
1058 Mykytyn, A.Z., Rissmann, M., Kok, A., Rosu, M.E., Schipper, D., Breugem, T.I., van den Doel, P.B.,  
1059 Chandler, F., Bestebroer, T., de Wit, M., et al. (2022). Omicron BA.1 and BA.2 are antigenically distinct  
1060 SARS-CoV-2 variants. *bioRxiv*, 2022.2002.2023.481644. 10.1101/2022.02.23.481644.  
1061 Naldini, L., Blomer, U., Gallay, P., Ory, D., Mulligan, R., Gage, F.H., Verma, I.M., and Trono, D. (1996). In  
1062 vivo gene delivery and stable transduction of nondividing cells by a lentiviral vector. *Science* 272, 263-  
1063 267. 10.1126/science.272.5259.263.  
1064 Neerukonda, S.N., Vassell, R., Herrup, R., Liu, S., Wang, T., Takeda, K., Yang, Y., Lin, T.L., Wang, W., and  
1065 Weiss, C.D. (2021a). Establishment of a well-characterized SARS-CoV-2 lentiviral pseudovirus  
1066 neutralization assay using 293T cells with stable expression of ACE2 and TMPRSS2. *PLoS One* 16,  
1067 e0248348. 10.1371/journal.pone.0248348.  
1068 Neerukonda, S.N., Vassell, R., Lusvardi, S., Wang, R., Echegaray, F., Bentley, L., Eakin, A.E., Erlandson,  
1069 K.J., Katzelnick, L.C., Weiss, C.D., and Wang, W. (2021b). SARS-CoV-2 Delta Variant Displays Moderate  
1070 Resistance to Neutralizing Antibodies and Spike Protein Properties of Higher Soluble ACE2 Sensitivity,  
1071 Enhanced Cleavage and Fusogenic Activity. *Viruses* 13. 10.3390/v13122485.  
1072 Pfizer (2022). Pfizer and BioNTech Announce Omicron-Adapted COVID-19 Vaccine Candidates  
1073 Demonstrate High Immune Response Against Omicron. [https://www.pfizer.com/news/press-  
1074 release/press-release-detail/pfizer-and-biontech-announce-omicron-adapted-covid-19](https://www.pfizer.com/news/press-release/press-release-detail/pfizer-and-biontech-announce-omicron-adapted-covid-19).



1075 Pulliam, J.R.C., van Schalkwyk, C., Govender, N., von Gottberg, A., Cohen, C., Groome, M.J., Dushoff, J.,  
1076 Mlisana, K., and Moultrie, H. (2022). Increased risk of SARS-CoV-2 reinfection associated with  
1077 emergence of Omicron in South Africa. *Science* 376, eabn4947. 10.1126/science.abn4947.  
1078 Qu, P., Faraone, J., Evans, J.P., Zou, X., Zheng, Y.M., Carlin, C., Bednash, J.S., Lozanski, G., Mallampalli,  
1079 R.K., Saif, L.J., et al. (2022). Neutralization of the SARS-CoV-2 Omicron BA.4/5 and BA.2.12.1 Subvariants.  
1080 *N Engl J Med* 386, 2526-2528. 10.1056/NEJMc2206725.  
1081 Quandt, J., Muik, A., Salisch, N., Lui, B.G., Lutz, S., Kruger, K., Wallisch, A.K., Adams-Quack, P., Bacher,  
1082 M., Finlayson, A., et al. (2022). Omicron BA.1 breakthrough infection drives cross-variant neutralization  
1083 and memory B cell formation against conserved epitopes. *Sci Immunol*, eabq2427.  
1084 10.1126/sciimmunol.abq2427.  
1085 R Core Team (2022). R: A language and environment for statistical computing. R Foundation for  
1086 Statistical Computing. <https://www.R-project.org/>.  
1087 Regev-Yochay, G., Gonen, T., Gilboa, M., Mandelboim, M., Indenbaum, V., Amit, S., Meltzer, L., Asraf, K.,  
1088 Cohen, C., Fluss, R., et al. (2022). Efficacy of a Fourth Dose of Covid-19 mRNA Vaccine against Omicron.  
1089 *New England Journal of Medicine* 386, 1377-1380. 10.1056/NEJMc2202542.  
1090 Reynolds, C.J., Pade, C., Gibbons, J.M., Otter, A.D., Lin, K.M., Munoz Sandoval, D., Pieper, F.P., Butler,  
1091 D.K., Liu, S., Joy, G., et al. (2022). Immune boosting by B.1.1.529 (Omicron) depends on previous SARS-  
1092 CoV-2 exposure. *Science*, eabq1841. 10.1126/science.abq1841.  
1093 Richard, S.A., Pollett, S.D., Lanteri, C.A., Millar, E.V., Fries, A.C., Maves, R.C., Utz, G.C., Lalani, T., Smith,  
1094 A., Mody, R.M., et al. (2021). COVID-19 Outcomes Among US Military Health System Beneficiaries  
1095 Include Complications Across Multiple Organ Systems and Substantial Functional Impairment. *Open*  
1096 *Forum Infect Dis* 8, ofab556. 10.1093/ofid/ofab556.  
1097 Richardson, S.I., Madzorera, V.S., Spencer, H., Manamela, N.P., van der Mescht, M.A., Lambson, B.E.,  
1098 Oosthuysen, B., Ayres, F., Makhado, Z., Moyo-Gwete, T., et al. (2022). SARS-CoV-2 Omicron triggers  
1099 cross-reactive neutralization and Fc effector functions in previously vaccinated, but not unvaccinated,  
1100 individuals. *Cell Host Microbe* 30, 880-886 e884. 10.1016/j.chom.2022.03.029.  
1101 Rössler, A., Netzl, A., Knabl, L., Schäfer, H., Wilks, S.H., Bante, D., Falkensammer, B., Borena, W., von  
1102 Laer, D., Smith, D., and Kimpel, J. (2022). BA.2 omicron differs immunologically from both BA.1 omicron  
1103 and pre-omicron variants. *medRxiv*, 2022.2005.2010.22274906. 10.1101/2022.05.10.22274906.  
1104 Russell, C.A., Jones, T.C., Barr, I.G., Cox, N.J., Garten, R.J., Gregory, V., Gust, I.D., Hampson, A.W., Hay,  
1105 A.J., Hurt, A.C., et al. (2008). The global circulation of seasonal influenza A (H3N2) viruses. *Science* 320,  
1106 340-346. 10.1126/science.1154137.  
1107 Smith, D.J., Lapedes, A.S., de Jong, J.C., Bestebroer, T.M., Rimmelzwaan, G.F., Osterhaus, A.D., and  
1108 Fouchier, R.A. (2004). Mapping the antigenic and genetic evolution of influenza virus. *Science* 305, 371-  
1109 376. 10.1126/science.1097211.  
1110 UK Health Security Agency (2022). COVID-19 vaccine surveillance report Week 24.  
1111 [https://assets.publishing.service.gov.uk/government/uploads/system/uploads/attachment\\_data/file/10](https://assets.publishing.service.gov.uk/government/uploads/system/uploads/attachment_data/file/1083443/Vaccine-surveillance-report-week-24.pdf)  
1112 [83443/Vaccine-surveillance-report-week-24.pdf](https://assets.publishing.service.gov.uk/government/uploads/system/uploads/attachment_data/file/1083443/Vaccine-surveillance-report-week-24.pdf).  
1113 Uriu, K., Kimura, I., Shirakawa, K., Takaori-Kondo, A., Nakada, T.A., Kaneda, A., Nakagawa, S., Sato, K.,  
1114 and Genotype to Phenotype Japan, C. (2021). Neutralization of the SARS-CoV-2 Mu Variant by  
1115 Convalescent and Vaccine Serum. *N Engl J Med* 385, 2397-2399. 10.1056/NEJMc2114706.  
1116 van der Straten, K., Guerra, D., van Gils, M.J., Bontjer, I., Caniels, T.G., van Willigen, H.D.G., Wynberg, E.,  
1117 Poniman, M., Burger, J.A., Bouhuijs, J.H., et al. (2022). Mapping the antigenic diversification of SARS-  
1118 CoV-2. *medRxiv*, 2022.2001.2003.21268582. 10.1101/2022.01.03.21268582.  
1119 Wang, P., Casner, R.G., Nair, M.S., Wang, M., Yu, J., Cerutti, G., Liu, L., Kwong, P.D., Huang, Y., Shapiro, L.,  
1120 and Ho, D.D. (2021a). Increased resistance of SARS-CoV-2 variant P.1 to antibody neutralization. *Cell*  
1121 *Host Microbe* 29, 747-751 e744. 10.1016/j.chom.2021.04.007.

- 1122 Wang, P., Nair, M.S., Liu, L., Iketani, S., Luo, Y., Guo, Y., Wang, M., Yu, J., Zhang, B., Kwong, P.D., et al.  
1123 (2021b). Antibody resistance of SARS-CoV-2 variants B.1.351 and B.1.1.7. *Nature* 593, 130-135.  
1124 10.1038/s41586-021-03398-2.
- 1125 Wang, Q., Guo, Y., Iketani, S., Li, Z., Mohri, H., Wang, M., Yu, J., Bowen, A.D., Chang, J.Y., Shah, J.G., et al.  
1126 (2022). SARS-CoV-2 Omicron BA.2.12.1, BA.4, and BA.5 subvariants evolved to extend antibody evasion.  
1127 *bioRxiv*, 2022.2005.2026.493517. 10.1101/2022.05.26.493517.
- 1128 Wibmer, C.K., Ayres, F., Hermanus, T., Madzivhandila, M., Kgagudi, P., Oosthuysen, B., Lambson, B.E., de  
1129 Oliveira, T., Vermeulen, M., van der Berg, K., et al. (2021). SARS-CoV-2 501Y.V2 escapes neutralization by  
1130 South African COVID-19 donor plasma. *Nat Med* 27, 622-625. 10.1038/s41591-021-01285-x.
- 1131 Wilks, S.H., Mühlemann, B., Shen, X., Türel, S., LeGresley, E.B., Netzl, A., Caniza, M.A., Chacaltana-  
1132 Huarcaya, J.N., Daniell, X., Datto, M.B., et al. (2022). Mapping SARS-CoV-2 antigenic relationships and  
1133 serological responses. *bioRxiv*, 2022.2001.2028.477987. 10.1101/2022.01.28.477987.
- 1134 World Health Organization (2020). WHO Coronavirus (COVID-19) Dashboard. <https://covid19.who.int/>.
- 1135 World Health Organization (2022a). Interim statement on the composition of current COVID-19  
1136 vaccines. [https://www.who.int/news/item/17-06-2022-interim-statement-on--the-composition-of-](https://www.who.int/news/item/17-06-2022-interim-statement-on--the-composition-of-current-COVID-19-vaccines)  
1137 [current-COVID-19-vaccines](https://www.who.int/news/item/17-06-2022-interim-statement-on--the-composition-of-current-COVID-19-vaccines).
- 1138 World Health Organization (2022b). WHO Vaccine Tracker.  
1139 <https://covid19.trackvaccines.org/agency/who/>.
- 1140 Yao, L., Zhu, K.L., Jiang, X.L., Wang, X.J., Zhan, B.D., Gao, H.X., Geng, X.Y., Duan, L.J., Dai, E.H., and Ma,  
1141 M.J. (2022). Omicron subvariants escape antibodies elicited by vaccination and BA.2.2 infection. *Lancet*  
1142 *Infect Dis*. 10.1016/S1473-3099(22)00410-8.
- 1143 Zufferey, R., Nagy, D., Mandel, R.J., Naldini, L., and Trono, D. (1997). Multiply attenuated lentiviral vector  
1144 achieves efficient gene delivery in vivo. *Nat Biotechnol* 15, 871-875. 10.1038/nbt0997-871.
- 1145

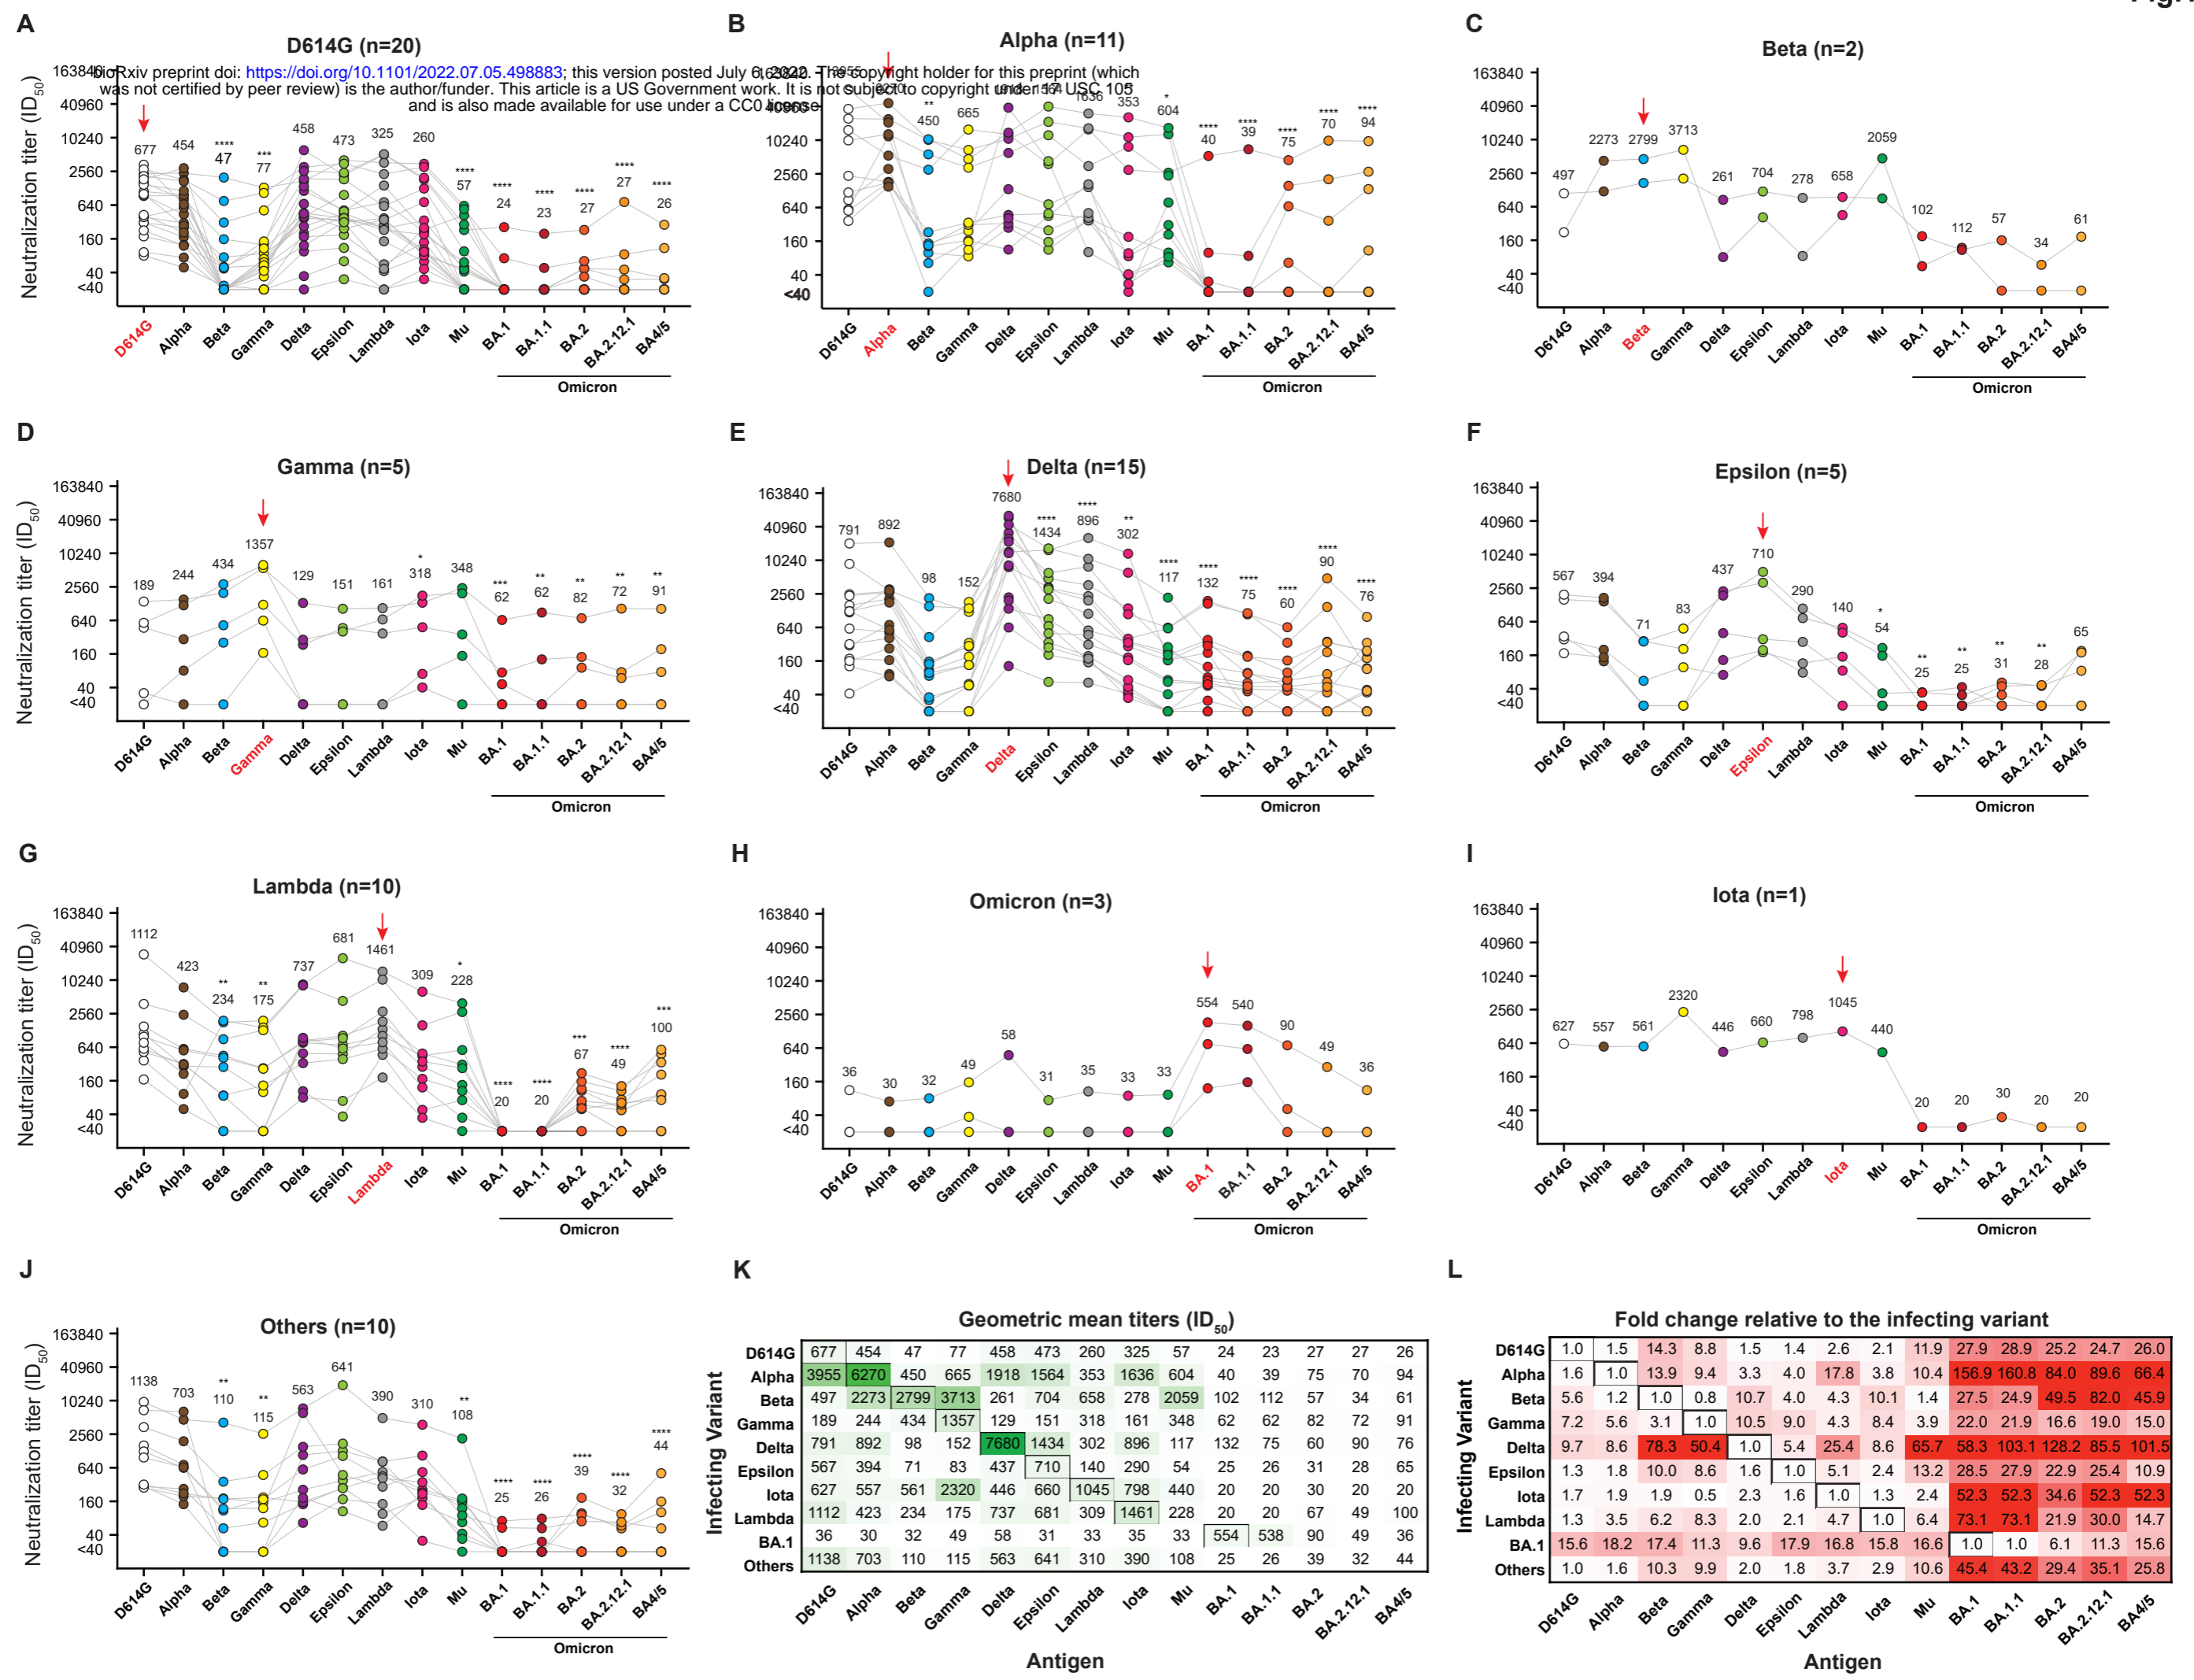

### A. Natural primary infection

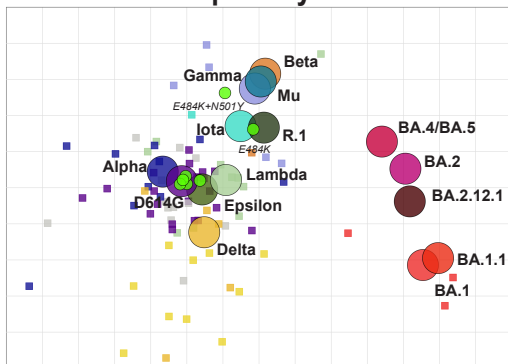

### B. 2 doses COVID-19 mRNA vaccine

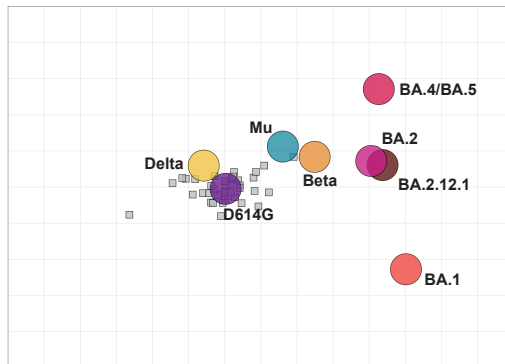

### C. 3 doses COVID-19 mRNA vaccine

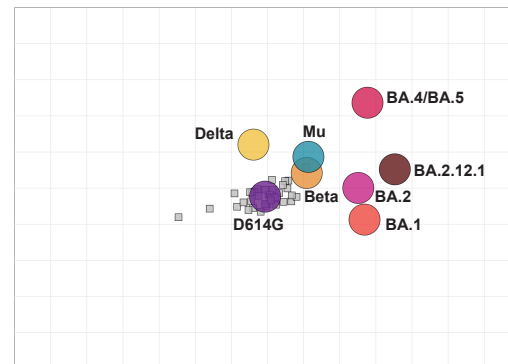

### D. Fold-change relative to D614G

| Variant   | Natural infection     | 2 dose vaccine     | 3 dose vaccine     |
|-----------|-----------------------|--------------------|--------------------|
| D614G     | 1                     | 1                  | 1                  |
| Delta     | 3 (2.7 - 3.3)         | 1.9 (1.7 - 2.1)    | 2.8 (2.5 - 3.1)    |
| Beta      | 14.5 (13.4 - 16)      | 6.4 (5.8 - 7)      | 2.5 (2.2 - 2.7)    |
| Mu        | 12.4 (11.1 - 14.4)    | 4 (3.6 - 4.4)      | 3.1 (2.9 - 3.4)    |
| BA.1      | 148.3 (130.6 - 165.8) | 46.7 (41.8 - 55.1) | 7.1 (6.4 - 7.6)    |
| BA.2      | 83.1 (74.2 - 93.2)    | 18 (16.5 - 19.8)   | 6 (5.7 - 6.7)      |
| BA.2.12.1 | 91.4 (78.4 - 102)     | 22.7 (20.1 - 25.8) | 12.9 (11.7 - 13.9) |
| BA.4/BA.5 | 55.8 (50.5 - 64.2)    | 36.2 (31.4 - 41.6) | 14.5 (13.2 - 15.7) |

### E. Spike and RBD substitutions

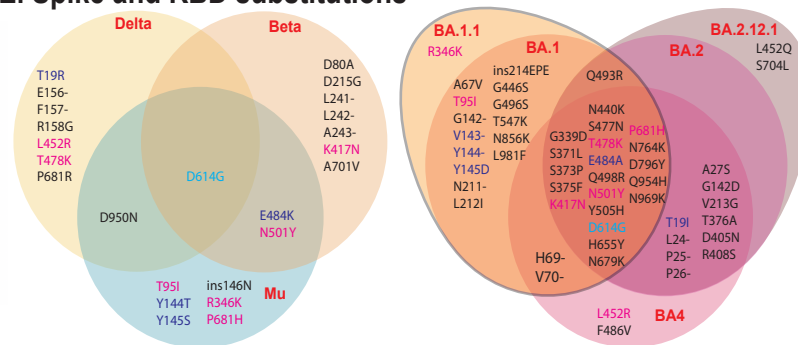

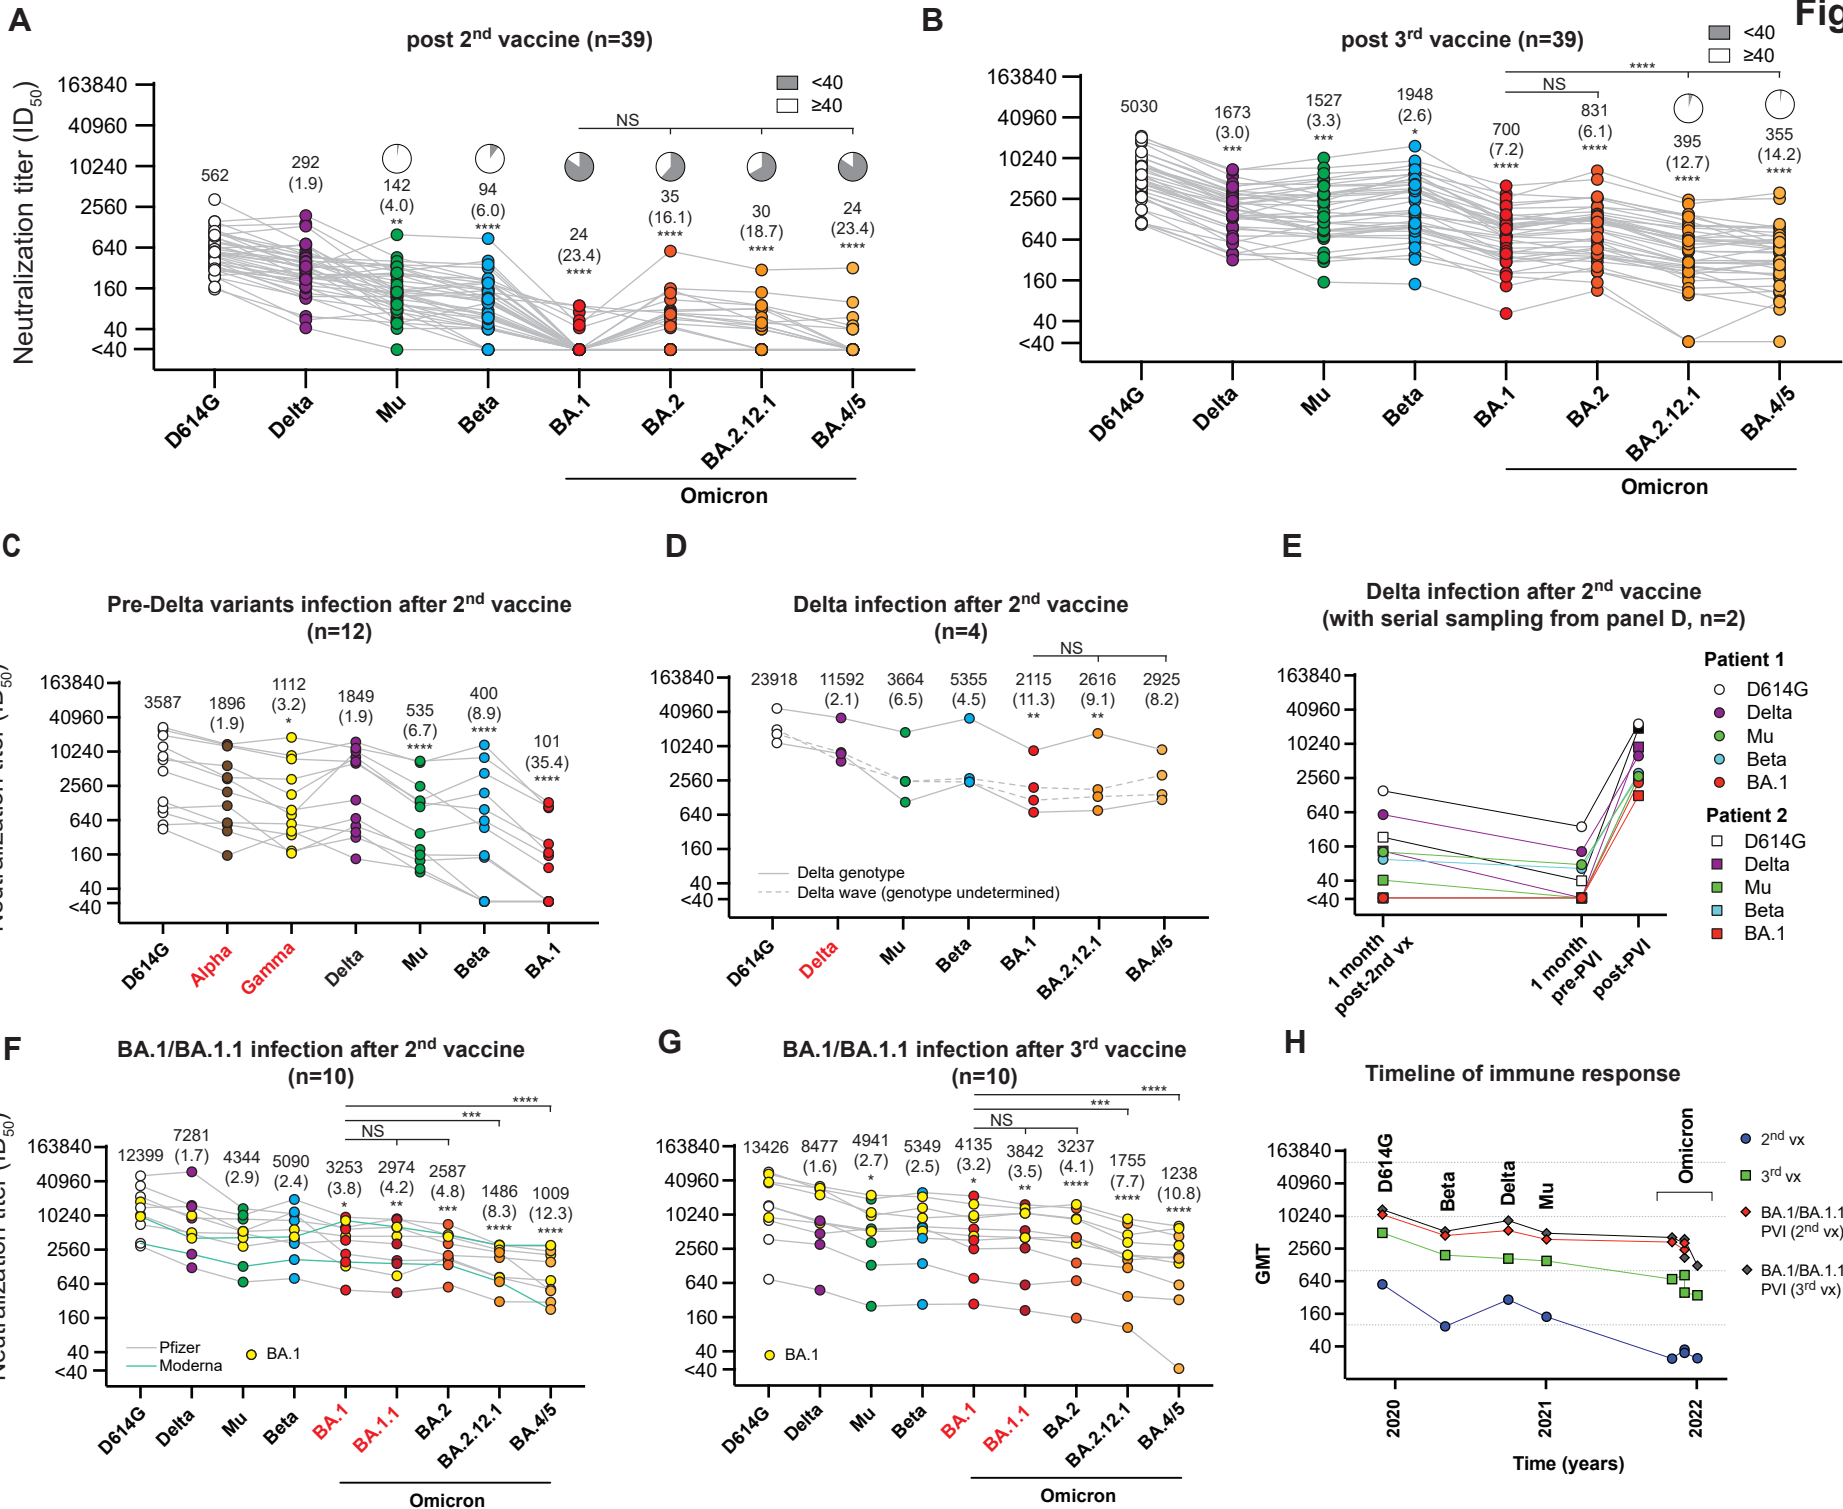

A. 3 doses COVID-19 mRNA vaccine

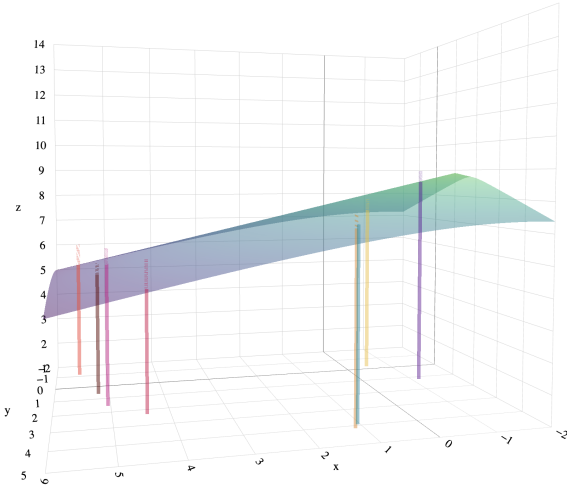

B. 2 doses vaccine + Omicron PVI

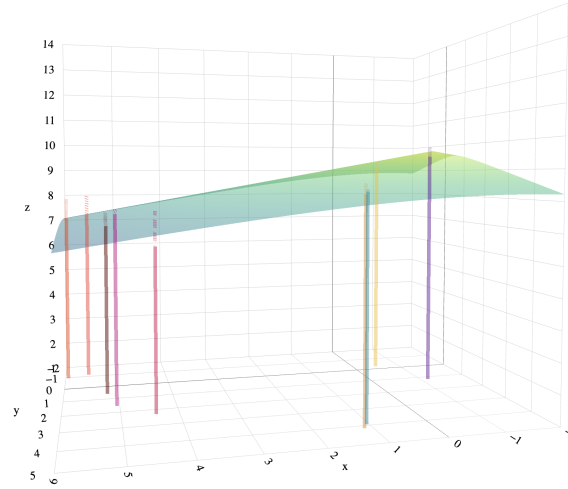

C. 3 doses vaccine + Omicron PVI

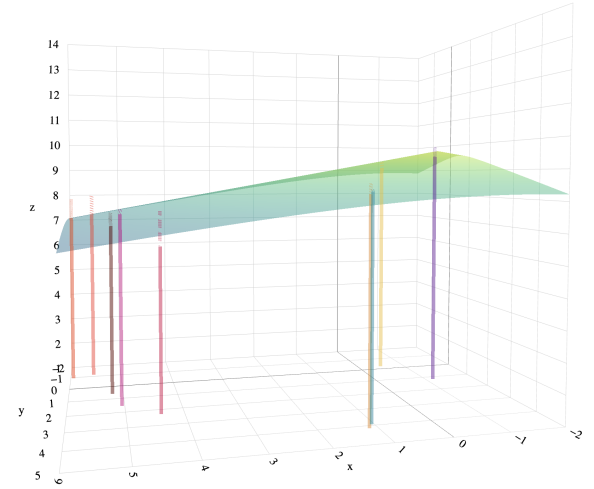

D. Breadth gain plot (cone-landscape)

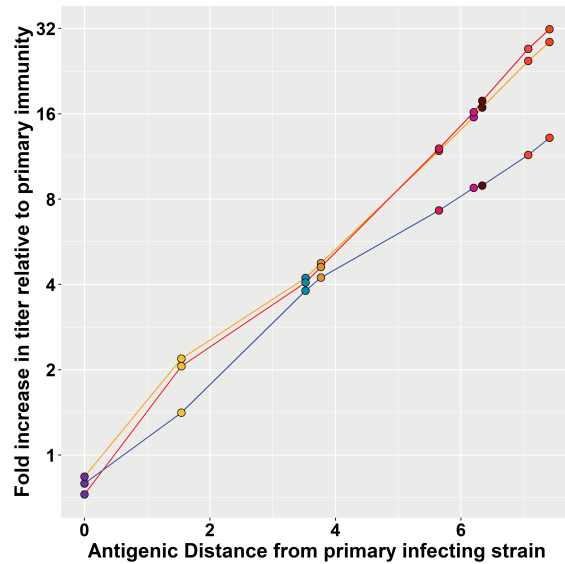

E. Breadth gain plot (non-linear)

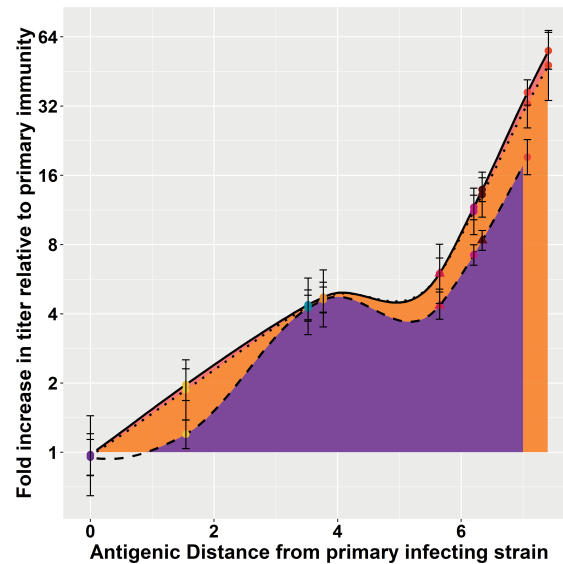

- Alpha\_B.1.1.7
  - Beta\_B.1.351
  - Epsilon\_B.1.427
  - Delta\_B.1.617.2
  - Gamma\_P1
  - Lambda\_C.37
  - Mu\_B.1.621
  - Iota\_B.1.526
  - WT\_D614G
  - Omicron\_BA.1
  - Omicron\_BA.1.1
  - Omicron\_BA.2
  - Omicron\_BA.2.12.1
  - Omicron\_BA.4\_BA.5
  - R.1
- Infection\_Type**
- 2-Dose Omicron BA.1/ BA 1.1 Breakthrough
  - 3-Dose Omicron BA.1/ BA 1.1 Breakthrough
  - 3 Dose Vaccine Only
